# Supplementary material for: Bifunctional phase-transfer catalysts for synthesis of 2-oxazolidinones from isocyanates and epoxides
Source: Royal Society of Chemistry journal article supplement (doi:10.1039/d0ra00693a), 2020-01-01

## Supplementary Materials

for

### Bifunctional phase-transfer catalysts for synthesis of 2-oxazolidinones from isocyanates and epoxides

Dong-Xiao Cui,<sup>a,b,†</sup> Yue-Dan Li,<sup>a,†</sup> Ping Huang,<sup>a</sup> Zhuang Tian,<sup>a</sup> Yan-Yan Jia<sup>b,\*</sup> and Ping-An Wang<sup>a,\*</sup>

<sup>a</sup> Department of Medicinal Chemistry, School of Pharmacy, The Fourth Military Medical University, Changle West Road 169, Xi'an, 710032, P. R. China

<sup>b</sup> Department of Pharmacy, Xijing Hospital, Fourth Military Medical University, Changle West Road 15, Xi'an 710032, P. R. China

<sup>†</sup> Co-first authors. These two authors have the same contribution to this work.

\*Correspondence: ping\_an1718@outlook.com, Tel.: +86-29-84776807

#### Contents

|                                                                         |     |
|-------------------------------------------------------------------------|-----|
| General.....                                                            | S2  |
| Typical procedures for the synthesis of 2-oxazolidinones.....           | S2  |
| <sup>1</sup> H and <sup>13</sup> C NMR Spectra of 2-oxazolidinones..... | S6  |
| HRMS of 2-oxazolidinones.....                                           | S19 |

## General

<sup>1</sup>H NMR and <sup>13</sup>C NMR spectra were measured in CDCl<sub>3</sub> solution on a Bruker AV-400 spectrometer using TMS as an internal reference. Coupling constant (*J*) values are given in Hz. Multiplicities are designated by the following abbreviations: s, singlet; d, doublet; t, triplet; q, quartet; br, broad; m, multiplet. High-resolution mass spectra (HRMS) were performed on a Bruker microTOF-Q II Mass Spectrometer with ES ionization (ESI). All commercially available reagents were used as received. Thin-layer chromatography on silica (with GF<sub>254</sub>) was used to monitor all reactions. Products were purified by flash column chromatography on silica gel purchased from Qingdao Haiyang Chemical Co., Ltd. The preparation and characterization data of all bifunctional phase-transfer catalysts (Bif-PTCs) were found in our previous report.<sup>1</sup>

### Typical procedure for the synthesis of 2-isoxazolidinones **3**

0.20 mmol of epoxide **1**, 2.7 mg of **Bif-PTC-1** (2.5 mol%), and 0.21 mmol of isocyanate **2** in 2.0 mL PhCl was stirred for 12 h at 100 °C under inert atmosphere. The solvent was evaporated under reduced pressure and the residue was purified by a flash column chromatography (petroleum ether : ethyl acetate = 2 : 1 to 1 : 3) to yield corresponding 2-oxazolidinones **3**.

## References

1. Y. Li, D. Cui, J. Zhu, P. Huang, Z. Tian, Y. Jia, P. Wang, *Green Chem.* 21 (2019) 5231–5237 .
2. Y. Toda, S. Gomyou, S. Tanaka, Y. Komiyama, A. Kikuchi, H. Suga, *Org. Lett.* 19 (2017) 5786–5789.
3. J.E. Herweh, T.A. Foglia, D. Swern, *J. Org. Chem.* 33 (1968) 4029–4033.
4. M. Zhou, X. Zheng, Y. Wang, D. Yuan, Y. Yao, *ChemCatChem.* 11 (2019) 5783-5787.

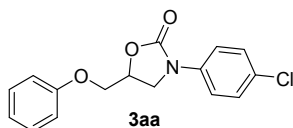

White solid,<sup>2</sup> <sup>1</sup>H NMR (400 MHz, CDCl<sub>3</sub>) δ 7.55 (d, *J* = 8.5 Hz, 2H), 7.42-7.29 (m, 4H), 7.03 (t, *J* = 7.2 Hz, 1H), 6.93 (d, *J* = 8.0 Hz, 2H), 5.01 (d, *J* = 3.6 Hz, 1H), 4.25 (d, *J* = 4.0 Hz, 2H), 4.20 (t, *J* = 8.8 Hz, 1H), 4.12-4.04 (m, 1H); <sup>13</sup>C NMR (101 MHz, CDCl<sub>3</sub>) δ 157.94, 154.24, 136.74, 129.68, 129.45, 129.14, 121.86, 119.42, 114.60, 70.39, 67.80, 47.34; HRMS (ESI) *m/z* calcd. for C<sub>16</sub>H<sub>15</sub>ClNO<sub>3</sub><sup>+</sup> [M+H]<sup>+</sup>: 304.0735, found 304.0741.

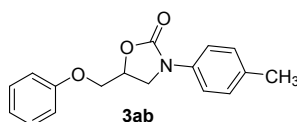

White solid,<sup>3</sup> <sup>1</sup>H NMR (400 MHz, CDCl<sub>3</sub>) δ 7.47 (d, *J* = 8.1 Hz, 2H), 7.34-7.30 (m, 2H), 7.21 (d, *J* = 8.0 Hz, 2H), 7.05-6.99 (m, 1H), 6.93 (d, *J* = 7.9 Hz, 2H), 4.99 (s, 1H), 4.31-4.14 (m, 3H), 4.10-4.03 (m, 1H), 2.34 (s, 3H); <sup>13</sup>C NMR (101 MHz, CDCl<sub>3</sub>) δ 158.04, 154.51, 135.61, 133.95, 129.65, 121.75, 118.46, 114.62, 70.34, 67.95, 47.63, 20.76; HRMS (ESI) *m/z* calcd. for C<sub>17</sub>H<sub>18</sub>NO<sub>3</sub><sup>+</sup> [M+H]<sup>+</sup>: 284.1281, found 284.1279.

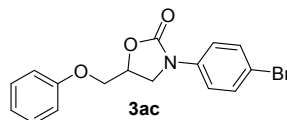

White solid,<sup>4</sup> <sup>1</sup>H NMR (400 MHz, CDCl<sub>3</sub>) δ 7.65 (d, *J* = 8.2 Hz, 1H), 7.51 (d, *J* = 1.4 Hz, 3H), 7.33 (t, *J* = 7.6 Hz, 2H), 7.03 (t, *J* = 7.3 Hz, 1H), 6.93 (d, *J* = 8.3 Hz, 2H), 5.01 (dd, *J* = 8.8, 4.7 Hz, 1H), 4.25 (d, *J* = 4.4 Hz, 2H), 4.19 (t, *J* = 8.8 Hz, 1H), 4.10-4.04 (m, 1H); <sup>13</sup>C NMR (101 MHz, CDCl<sub>3</sub>) δ 157.93, 154.18, 137.21, 129.69, 121.87, 119.73, 117.05, 114.60, 70.40, 67.80, 47.26; HRMS (ESI) *m/z* calcd. for C<sub>16</sub>H<sub>15</sub>BrNO<sub>3</sub><sup>+</sup> [M+H]<sup>+</sup>: 348.0230, found 348.0236.

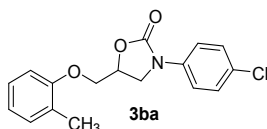

White solid, <sup>1</sup>H NMR (400 MHz, CDCl<sub>3</sub>) δ 7.56 (d, *J* = 8.7 Hz, 2H), 7.37 (d, *J* = 8.7 Hz, 2H), 7.23-7.09 (m, 2H), 6.93 (t, *J* = 7.1 Hz, 1H), 6.82 (d, *J* = 7.9 Hz, 1H), 5.03 (d, *J* = 3.9 Hz, 1H), 4.36-4.15 (m, 3H), 4.13-4.07 (m, 1H), 2.12 (s, 3H); HRMS (ESI) *m/z* calcd. for C<sub>17</sub>H<sub>16</sub>ClNNaO<sub>3</sub><sup>+</sup> [M+Na]<sup>+</sup>: 340.0711, found 340.0709.

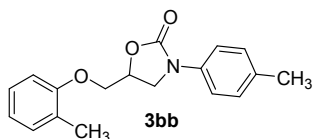

White solid, <sup>1</sup>H NMR (400 MHz, CDCl<sub>3</sub>) δ 7.49 (d, *J* = 7.5 Hz, 2H), 7.20 (dd, *J* = 15.0, 7.3 Hz, 4H), 6.95 (d, *J* = 6.7 Hz, 1H), 6.83 (d, *J* = 7.6 Hz, 1H), 4.97 (s, 1H), 4.20 (dd, *J* = 14.6, 10.4 Hz, 3H), 4.06 (s, 1H), 2.38 (s, 3H), 2.18 (s, 3H); <sup>13</sup>C NMR (101 MHz, CDCl<sub>3</sub>) containing isomers, δ 156.16, 154.69, 148.97, 139.27, 135.72, 133.82, 131.24, 130.95 and 130.86, 129.97 and 129.88, 129.63 and 129.43, 128.15, 127.03, 126.89, 121.39, 118.44, 113.20, 111.04, 70.54, 68.42 and 68.26, 47.44, 21.21 and 20.76, 16.06; HRMS (ESI) *m/z* calcd. for C<sub>18</sub>H<sub>20</sub>NO<sub>3</sub><sup>+</sup> [M+H]<sup>+</sup>: 298.1438, found 298.1440.

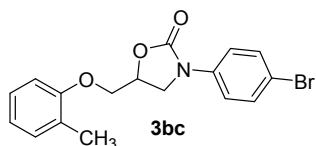

White solid,  $^1\text{H}$  NMR (400 MHz,  $\text{CDCl}_3$ )  $\delta$  7.51 (s, 4H), 7.23-7.11 (m, 2H), 6.94 (d,  $J = 7.3$  Hz, 1H), 6.82 (d,  $J = 8.0$  Hz, 1H), 5.03 (d,  $J = 4.0$  Hz, 1H), 4.24 (dd,  $J = 22.5, 6.3$  Hz, 3H), 4.12-4.07 (m, 1H), 2.13 (s, 3H); HRMS (ESI)  $m/z$  calcd. for  $\text{C}_{17}\text{H}_{16}\text{BrNNaO}_3^+$   $[\text{M}+\text{Na}]^+$ : 384.0206, found 384.0200.

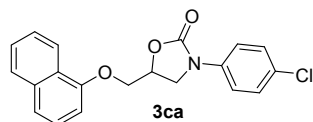

White solid,  $^1\text{H}$  NMR (400 MHz,  $\text{CDCl}_3$ )  $\delta$  8.07 (d,  $J = 8.4$  Hz, 1H), 7.82 (d,  $J = 8.2$  Hz, 1H), 7.60 (d,  $J = 8.9$  Hz, 2H), 7.50 (dd,  $J = 7.6, 4.6$  Hz, 2H), 7.39 (m, 4H), 6.85 (d,  $J = 7.6$  Hz, 1H), 5.16 (m, 1H), 4.44 (m, 2H), 4.32 (t,  $J = 8.9$  Hz, 1H), 4.20 (dd,  $J = 8.8, 5.4$  Hz, 1H);  $^{13}\text{C}$  NMR (101 MHz,  $\text{CDCl}_3$ )  $\delta$  154.35, 153.61, 136.75, 134.50, 129.46, 129.17, 127.58, 126.70, 125.62, 125.60, 125.28, 121.50, 119.45, 104.94, 70.51, 68.31, 47.37; HRMS (ESI)  $m/z$  calcd. for  $\text{C}_{20}\text{H}_{17}\text{ClNO}_3^+$   $[\text{M}+\text{H}]^+$ : 354.0891, found 354.0893.

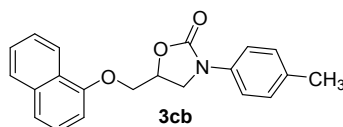

Light yellow oil,  $^1\text{H}$  NMR (400 MHz,  $\text{CDCl}_3$ )  $\delta$  8.37-6.27 (m, 11H), 5.32 (s, 1H), 4.29 (d,  $J = 5.1$  Hz, 1H), 4.09 (d,  $J = 8.6$  Hz, 1H), 3.96 (d,  $J = 8.5$  Hz, 1H), 3.63-3.35 (m, 1H), 2.33 (s, 3H).

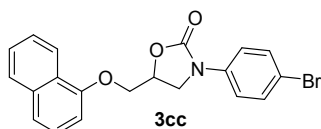

White solid,  $^1\text{H}$  NMR (400 MHz,  $\text{CDCl}_3$ )  $\delta$  8.07 (d,  $J = 8.3$  Hz, 1H), 7.82 (d,  $J = 8.1$  Hz, 1H), 7.66-7.45 (m, 5H), 7.39 (t,  $J = 7.9$  Hz, 2H), 7.29 (s, 1H), 6.85 (d,  $J = 7.5$  Hz, 1H), 5.16 (dd,  $J = 8.8, 4.3$  Hz, 1H), 4.44 (m, 2H), 4.31 (t,  $J = 8.9$  Hz, 1H), 4.19 (dd,  $J = 8.8, 5.4$  Hz, 1H);  $^{13}\text{C}$  NMR (101 MHz,  $\text{CDCl}_3$ )  $\delta$  154.31, 153.60, 137.26, 134.50, 132.10, 127.58, 126.70, 125.63, 125.61, 125.27, 121.49, 119.75, 117.05, 104.95, 70.52, 68.31, 47.26; HRMS (ESI)  $m/z$  calcd. for  $\text{C}_{20}\text{H}_{17}\text{BrNO}_3^+$   $[\text{M}+\text{H}]^+$ : 398.0386, found 398.0380.

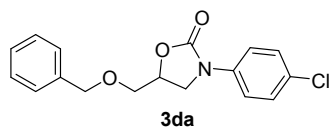

White solid,  $^1\text{H}$  NMR (400 MHz,  $\text{CDCl}_3$ )  $\delta$  7.44 (d,  $J = 6.2$  Hz, 2H), 7.29 (s, 7H), 4.76 (s, 1H), 4.58 (s, 2H), 4.02 (s, 1H), 3.87 (s, 1H), 3.70 (d,  $J = 3.1$  Hz, 2H).

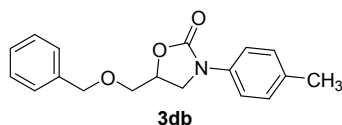

White solid,  $^1\text{H}$  NMR (400 MHz,  $\text{CDCl}_3$ )  $\delta$  7.40 (dd,  $J = 29.5, 9.0$  Hz, 6H), 7.20 (dd,  $J = 20.2, 11.9$  Hz, 3H), 4.79 (s, 1H), 4.64 (d,  $J = 2.4$  Hz, 2H), 4.07 (s, 1H), 3.93 (s, 1H), 3.74 (d,  $J = 4.7$  Hz, 2H), 2.35 (s, 3H).

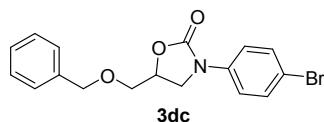

White solid,  $^1\text{H NMR}$  (400 MHz,  $\text{CDCl}_3$ )  $\delta$  7.54 – 7.41 (m, 4H), 7.40 – 7.31 (m, 4H), 7.28 (s, 1H), 4.80 (s, 1H), 4.64 (s, 2H), 4.05 (d,  $J = 6.3$  Hz, 1H), 3.92 (d,  $J = 7.9$  Hz, 1H), 3.75 (s, 2H).

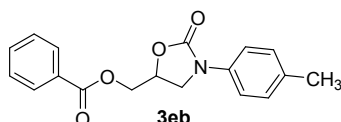

White solid,  $^1\text{H NMR}$  (400 MHz,  $\text{CDCl}_3$ )  $\delta$  8.01 (d,  $J = 7.1$  Hz, 2H), 7.56 (d,  $J = 6.6$  Hz, 1H), 7.42 (s, 4H), 7.18 (d,  $J = 7.3$  Hz, 2H), 4.97 (s, 1H), 4.57 (dd,  $J = 27.9, 11.7$  Hz, 2H), 4.18 (t,  $J = 8.7$  Hz, 1H), 3.91 (d,  $J = 6.0$  Hz, 1H), 2.34 (s, 3H);  $^{13}\text{C NMR}$  (101 MHz,  $\text{CDCl}_3$ )  $\delta$  166.11, 154.43, 135.51, 134.01, 133.47, 129.76, 129.64, 129.18, 128.52, 118.52, 70.17, 64.85, 47.35, 20.73; HRMS (ESI)  $m/z$  calcd. for  $\text{C}_{18}\text{H}_{18}\text{NO}_4^+$  [ $\text{M}+\text{H}$ ] $^+$ : 312.1230, found 312.1232.

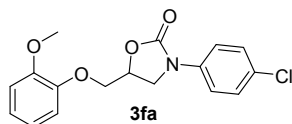

White solid,  $^1\text{H NMR}$  (400 MHz,  $\text{CDCl}_3$ )  $\delta$  7.56 (d,  $J = 8.8$  Hz, 2H), 7.37 (d,  $J = 8.8$  Hz, 2H), 6.98 (m, 4H), 5.00 (dd,  $J = 13.4, 5.2$  Hz, 1H), 4.36-4.24 (m, 2H), 4.24-4.12 (m, 2H), 3.84 (s, 3H);  $^{13}\text{C NMR}$  (101 MHz,  $\text{CDCl}_3$ )  $\delta$  154.33, 150.16, 147.61, 136.86, 129.32, 129.07, 123.09, 121.03, 119.47, 115.99, 112.41, 70.67, 70.00, 55.83, 47.37; HRMS (ESI)  $m/z$  calcd. for  $\text{C}_{17}\text{H}_{17}\text{ClNO}_4^+$  [ $\text{M}+\text{H}$ ] $^+$ : 334.0841, found 334.0840.

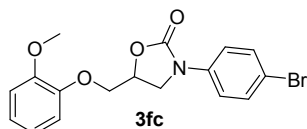

White solid,  $^1\text{H NMR}$  (400 MHz,  $\text{CDCl}_3$ )  $\delta$  7.64-7.40 (m, 4H), 7.09-6.85 (m, 4H), 5.05-4.97 (m, 1H), 4.34-4.23 (m, 2H), 4.23-4.12 (m, 2H), 3.80 (s, 3H);  $^{13}\text{C NMR}$  (101 MHz,  $\text{CDCl}_3$ )  $\delta$  154.27, 150.17, 147.61, 137.37, 132.01, 123.10, 121.03, 119.78, 116.93, 116.00, 112.40, 70.67, 70.00, 55.83, 47.30; HRMS (ESI)  $m/z$  calcd. for  $\text{C}_{17}\text{H}_{17}\text{BrNO}_4^+$  [ $\text{M}+\text{H}$ ] $^+$ : 378.0335, found 378.0330.

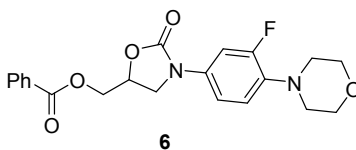

light yellow solid,  $^1\text{H NMR}$  (400 MHz,  $\text{CDCl}_3$ )  $\delta$  8.06 (d,  $J = 7.44$  Hz, 2H), 7.61 (t,  $J = 8.48$  Hz, 1H), 7.49 (q,  $J = 7.72$  Hz, 2H), 6.99-6.82 (m, 2H), 6.71 (br, 1H), 5.42-5.29 (m, 1H), 4.64-4.61 (m, 2H), 4.14-4.08 (m, 1H), 3.90 (s, 4H), 3.85-3.83 (m, 1H), 3.04 (s, 4H); HRMS (ESI)  $m/z$  calcd. for  $\text{C}_{21}\text{H}_{23}\text{ClFN}_2\text{O}_5^+$  [ $\text{M}\cdot\text{HCl}+\text{H}$ ] $^+$ : 437.1274, found 437.1271.

# NMR copies of 2-oxazolidinones

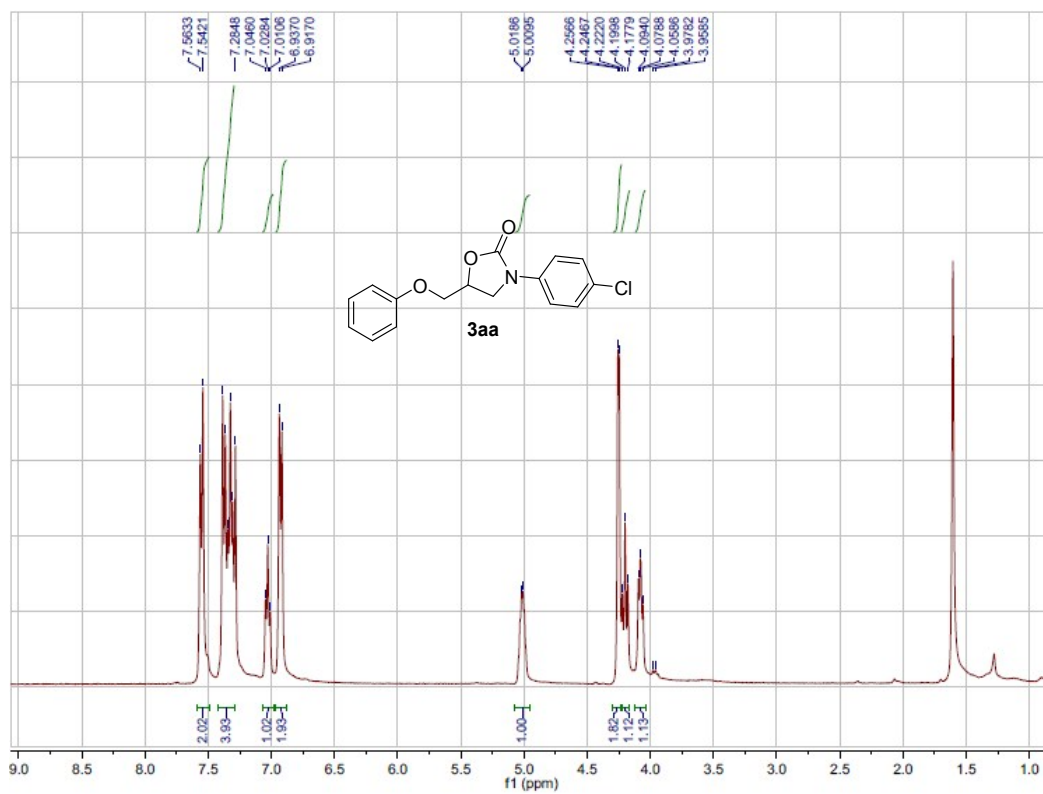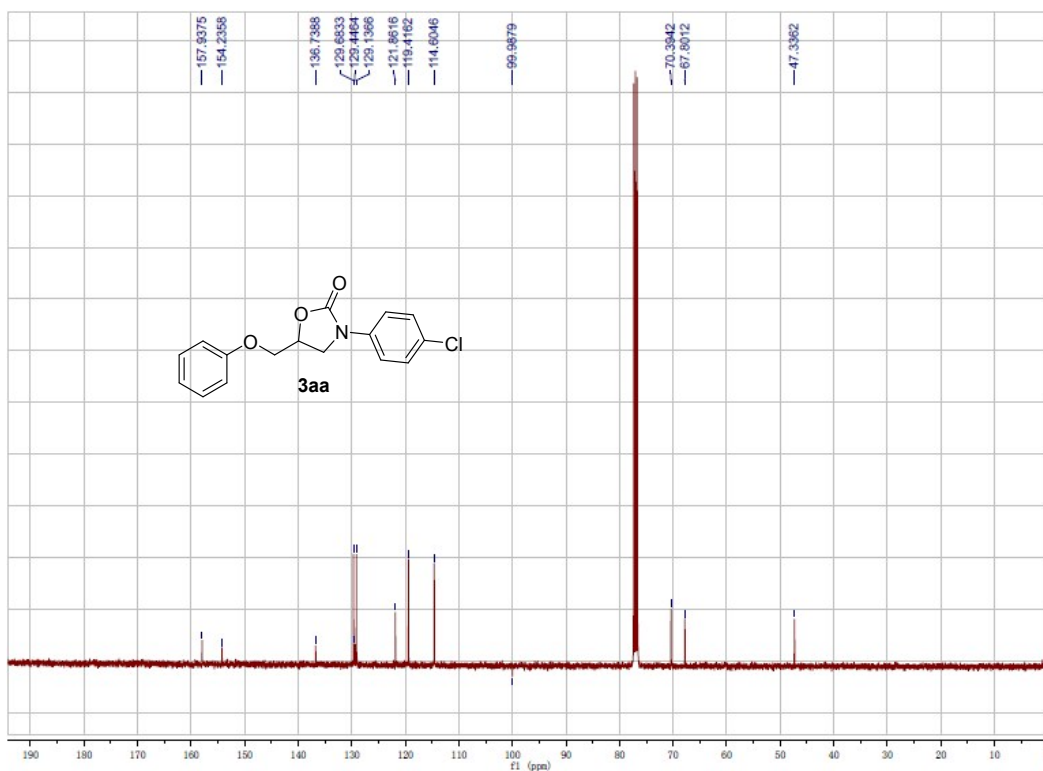

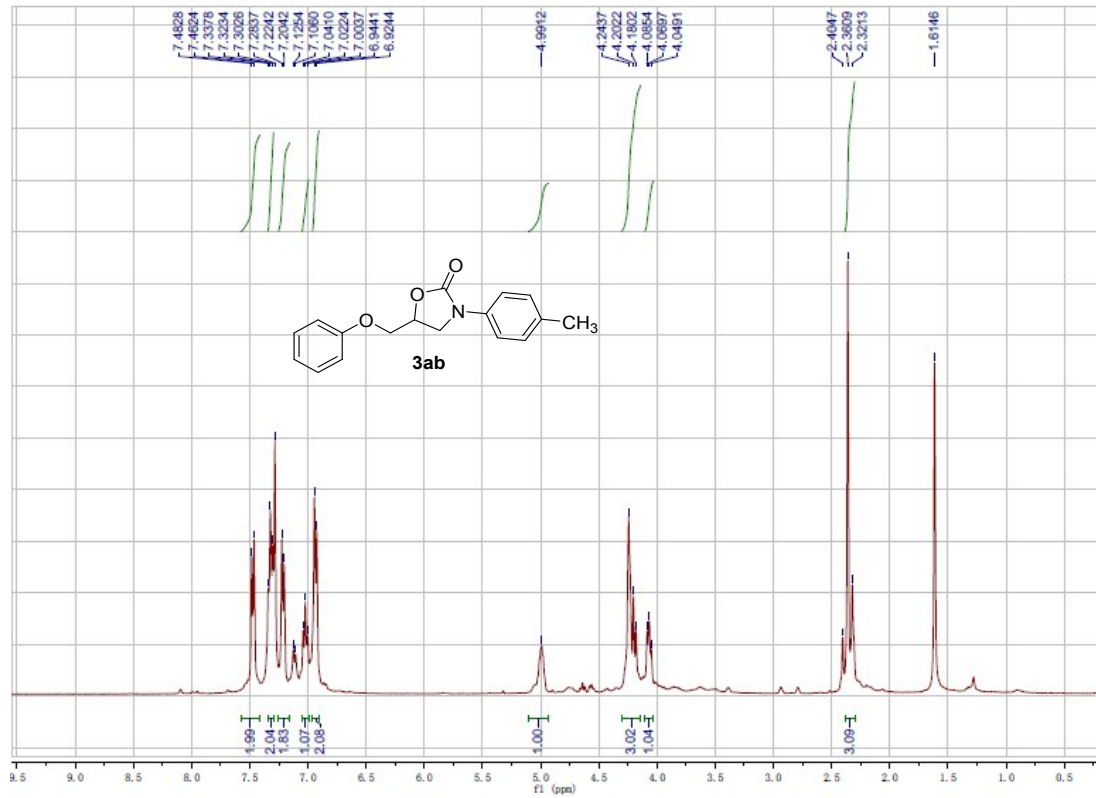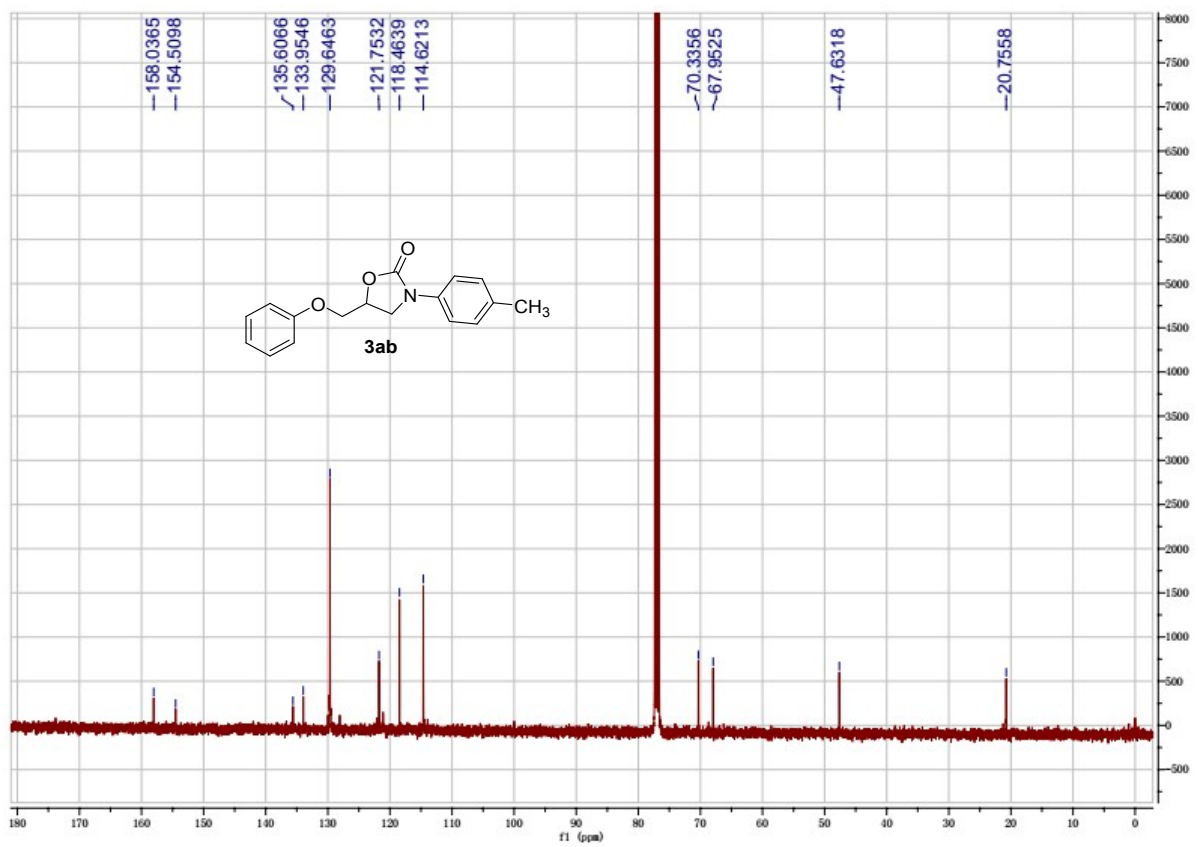

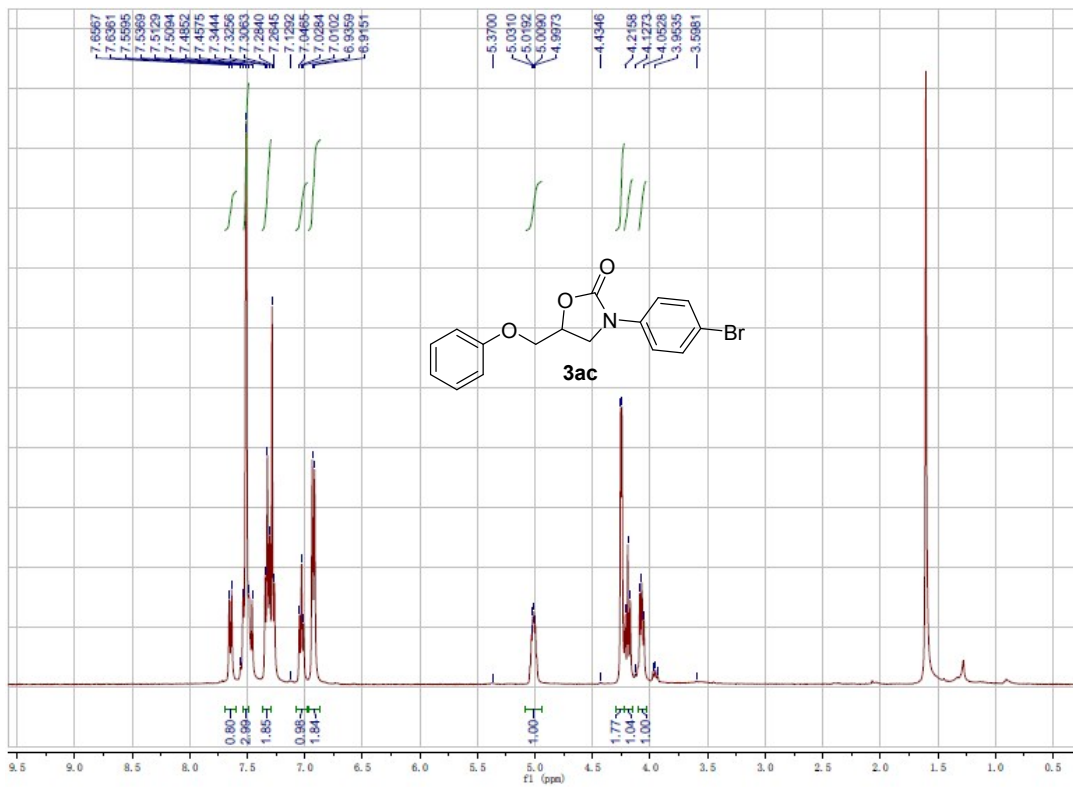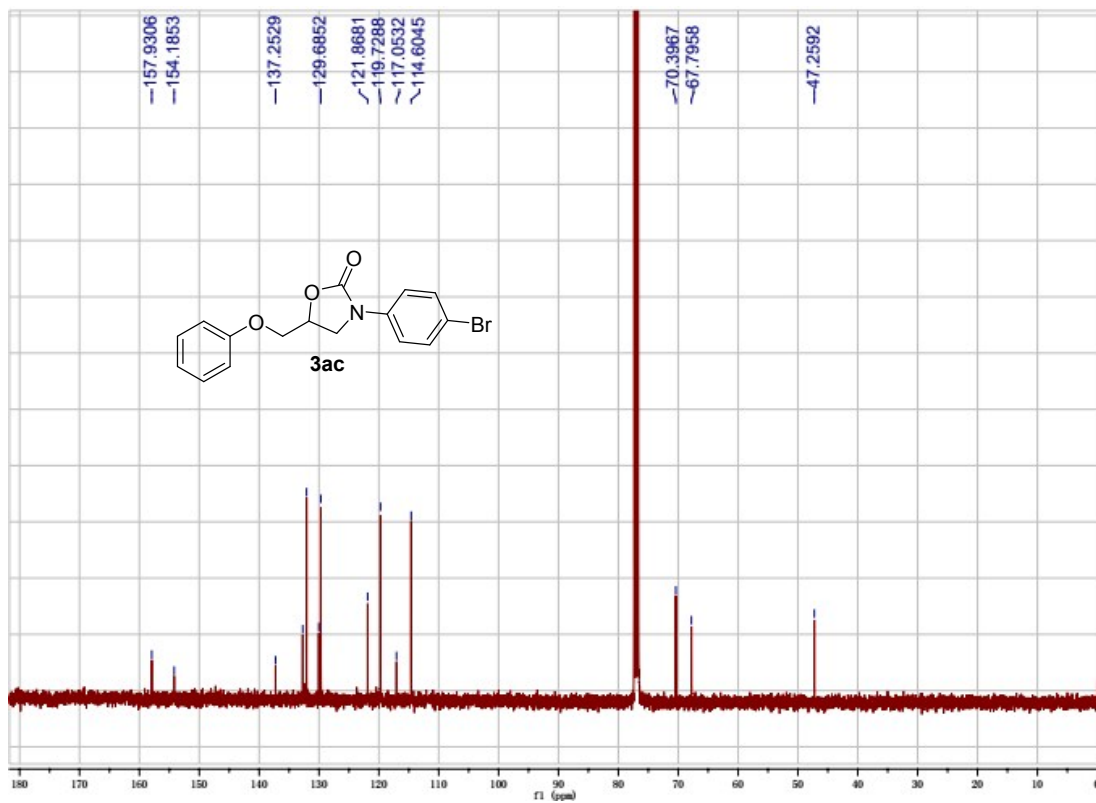



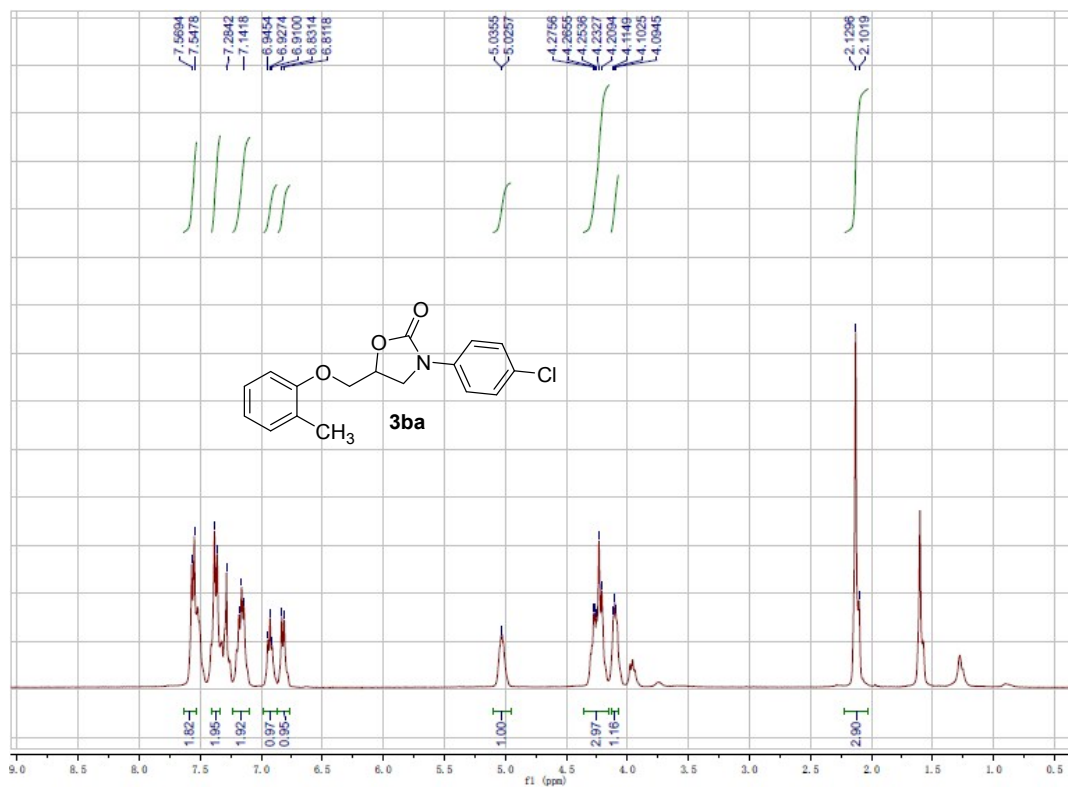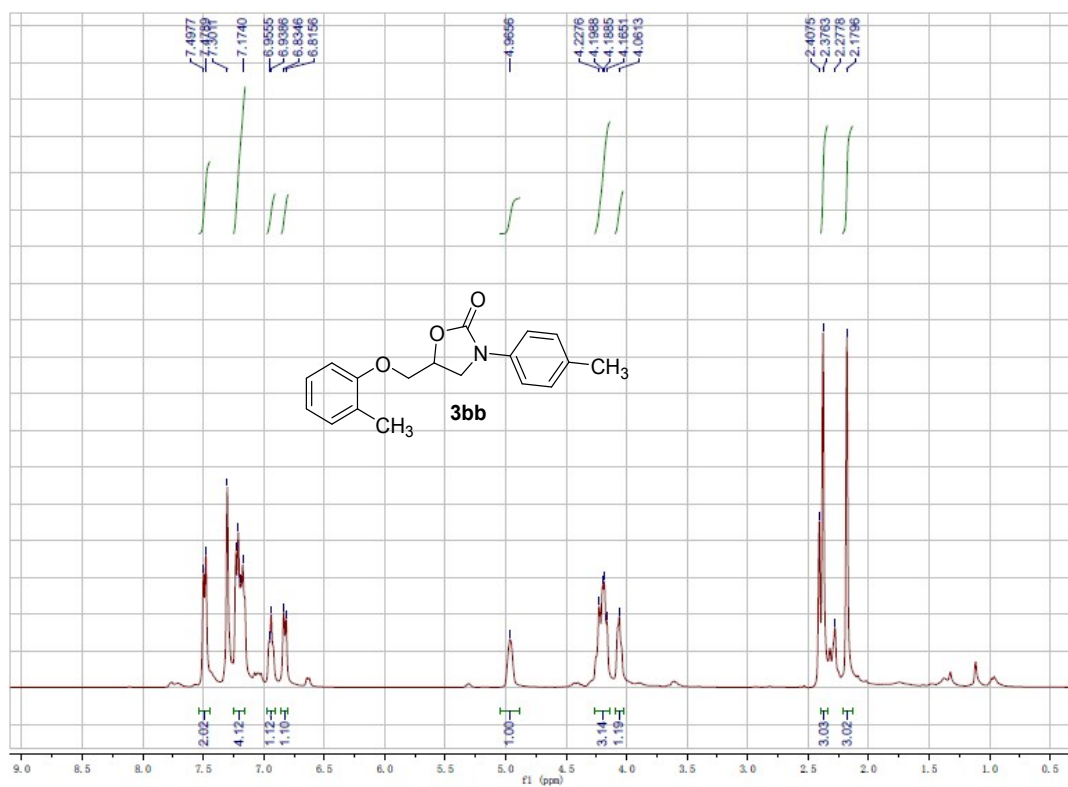

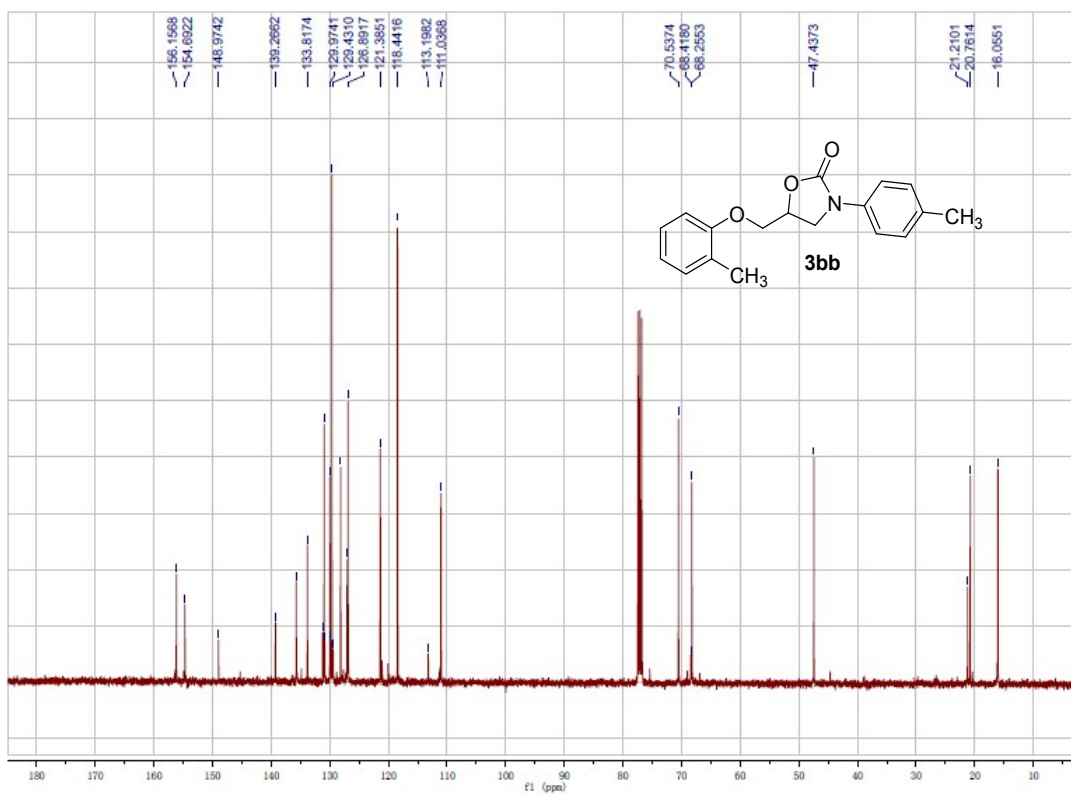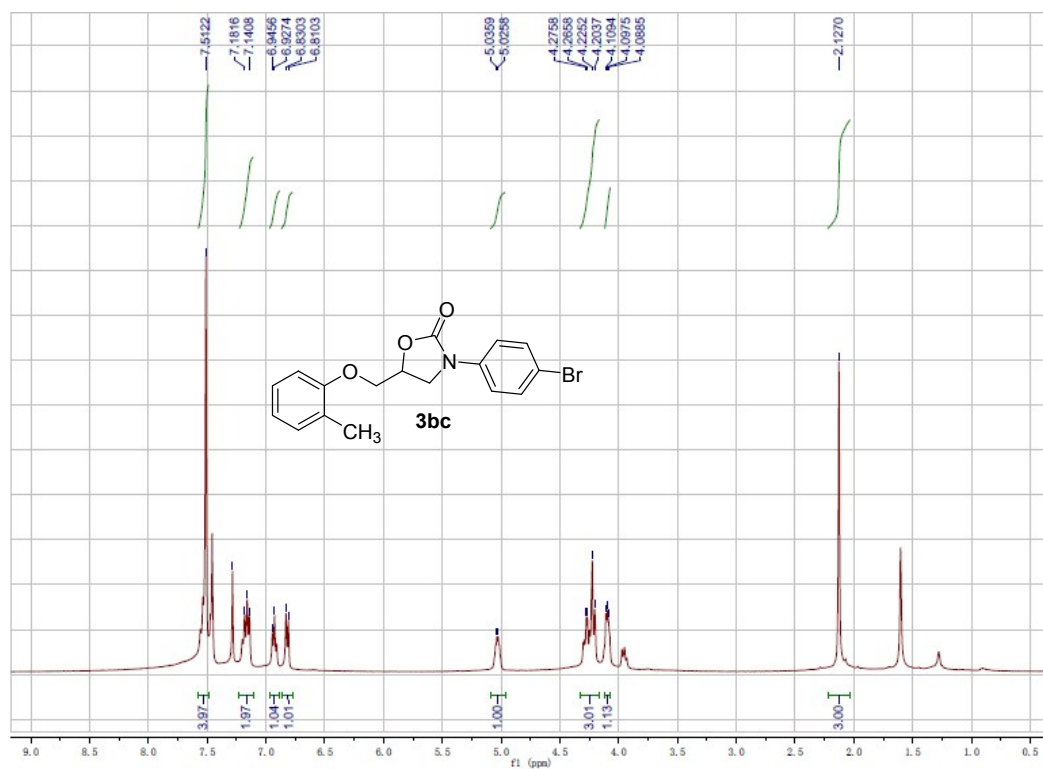

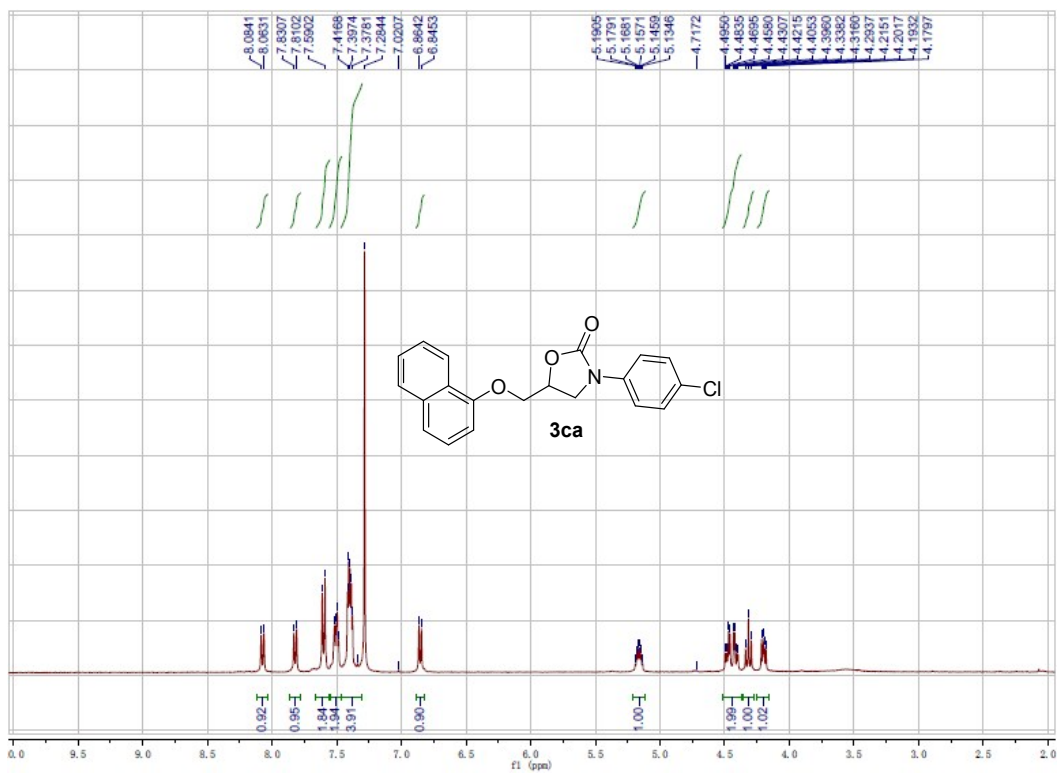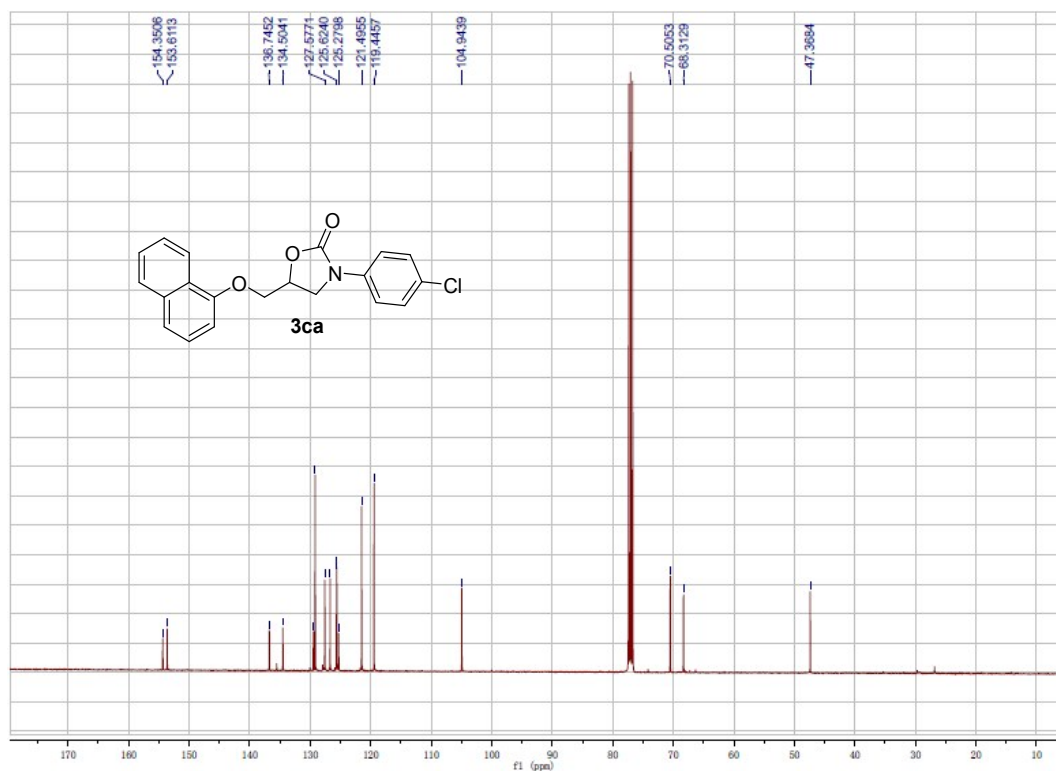

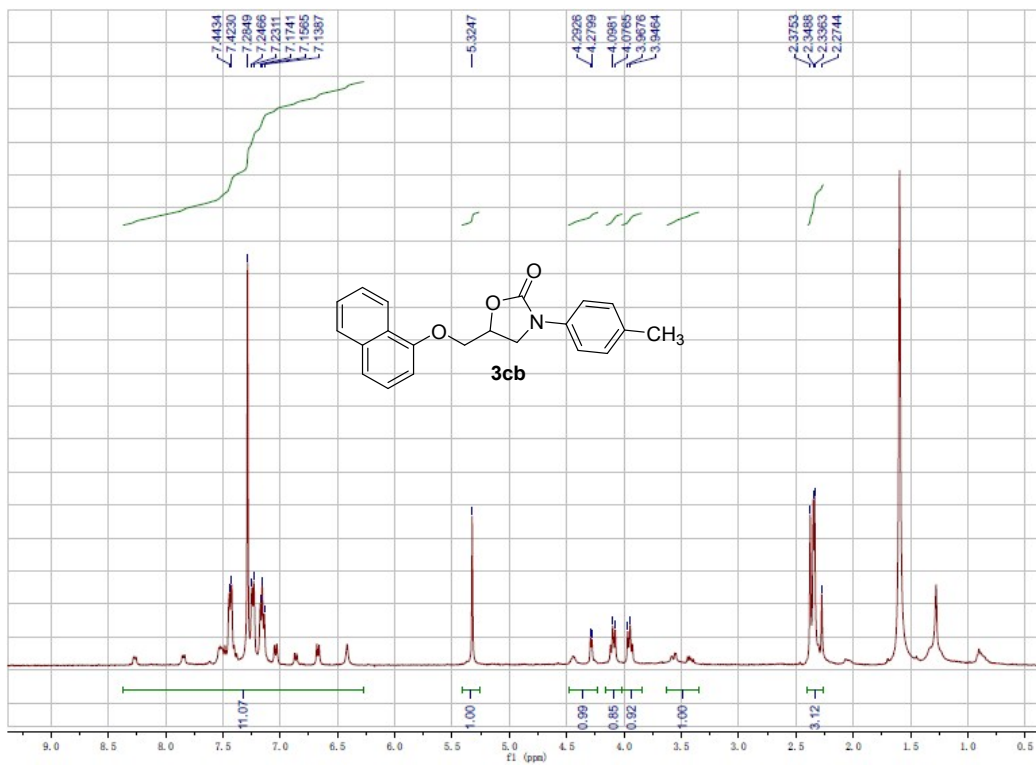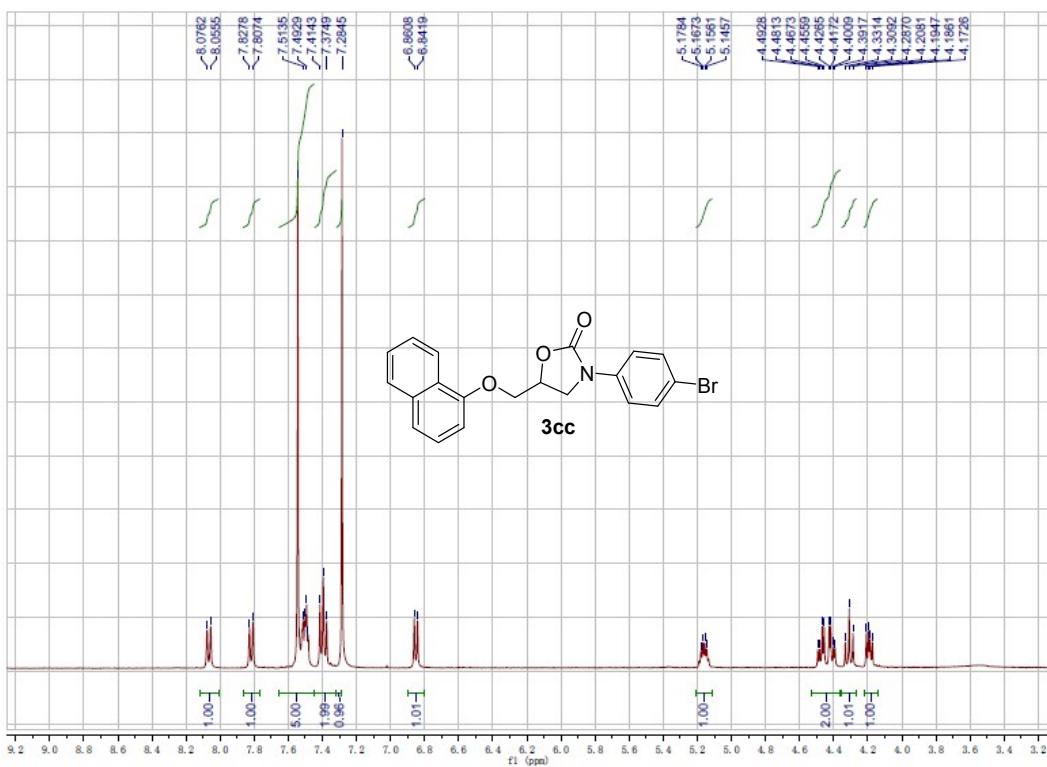

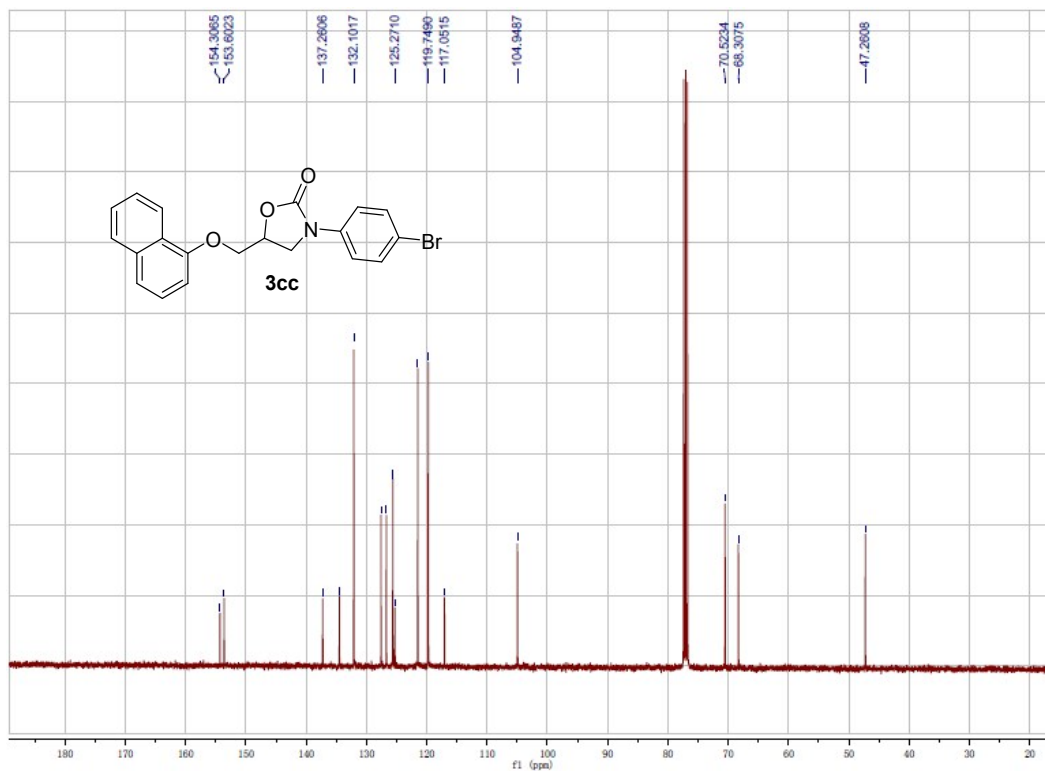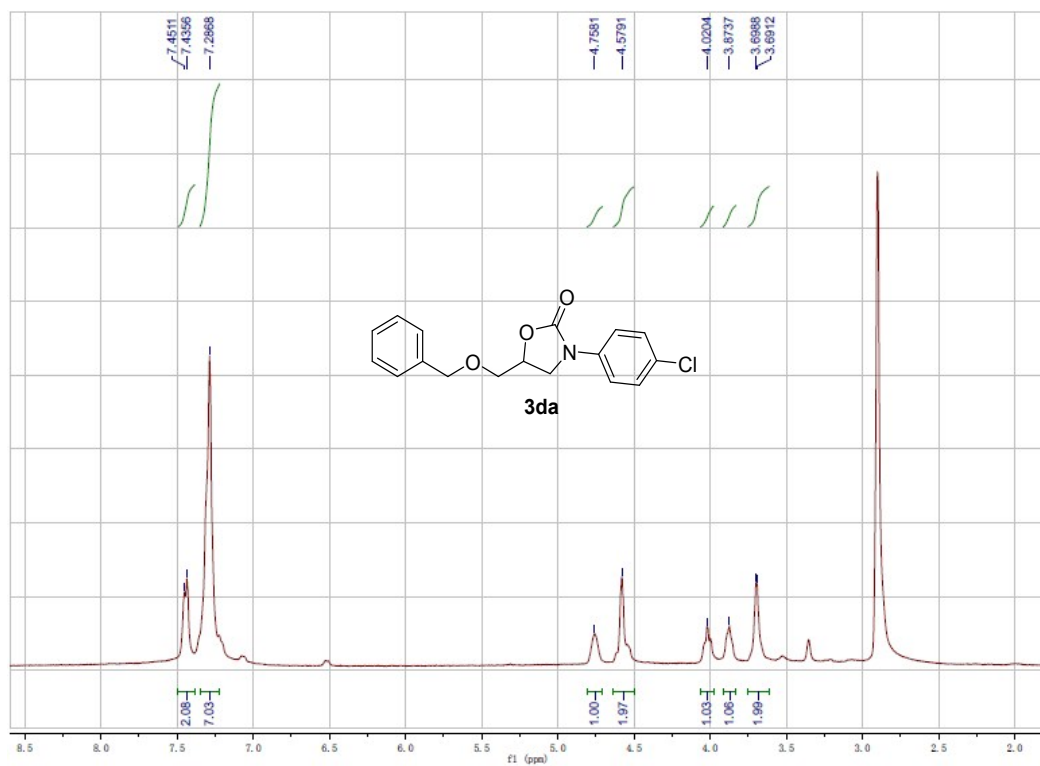

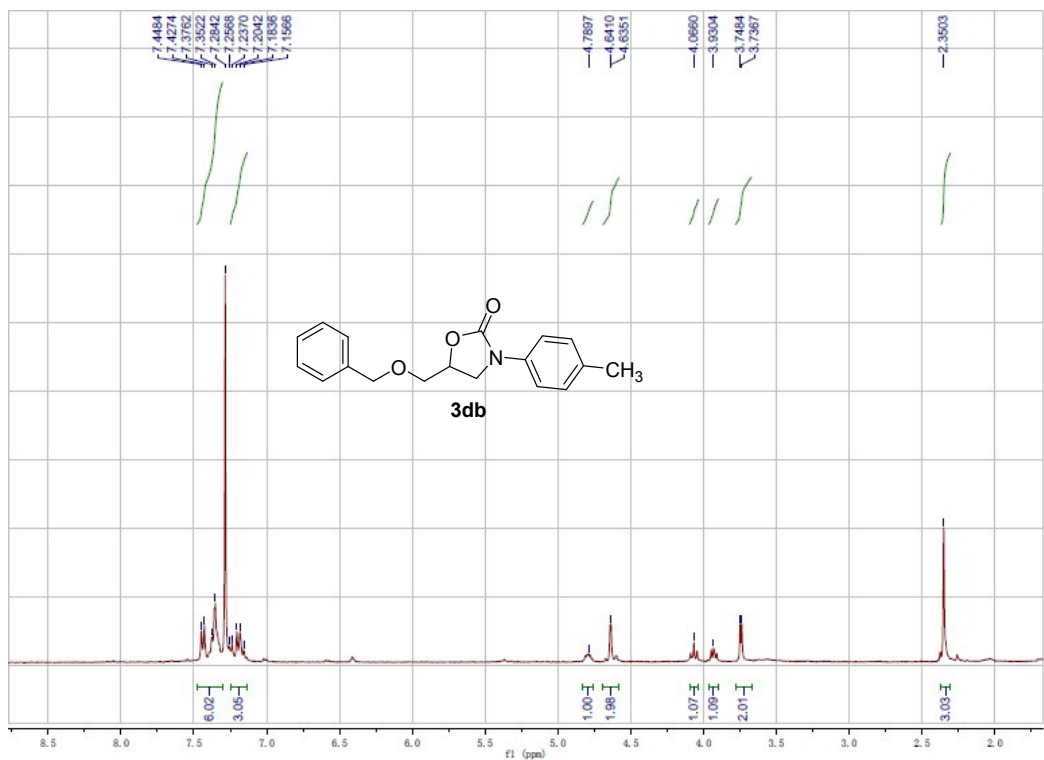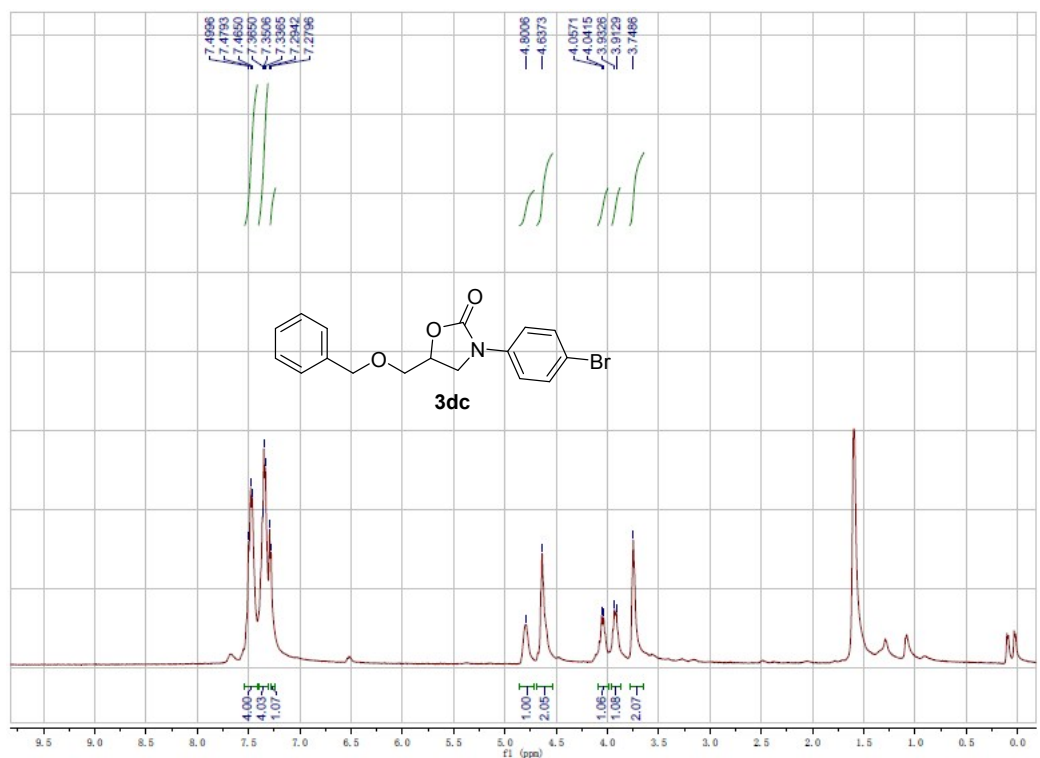

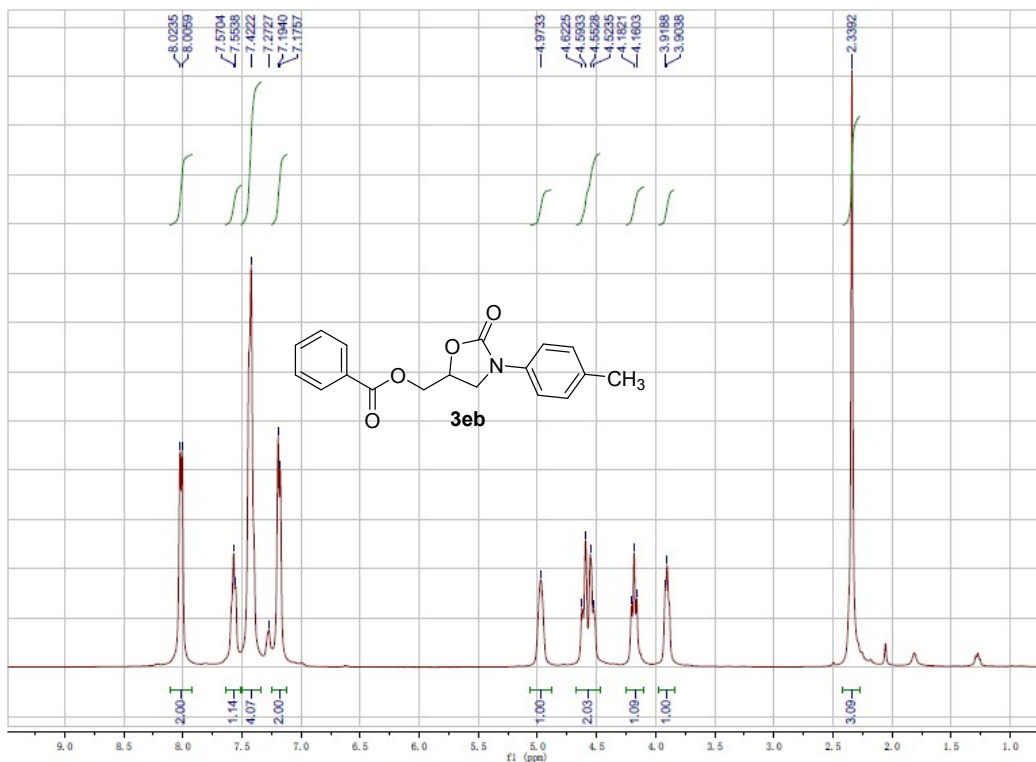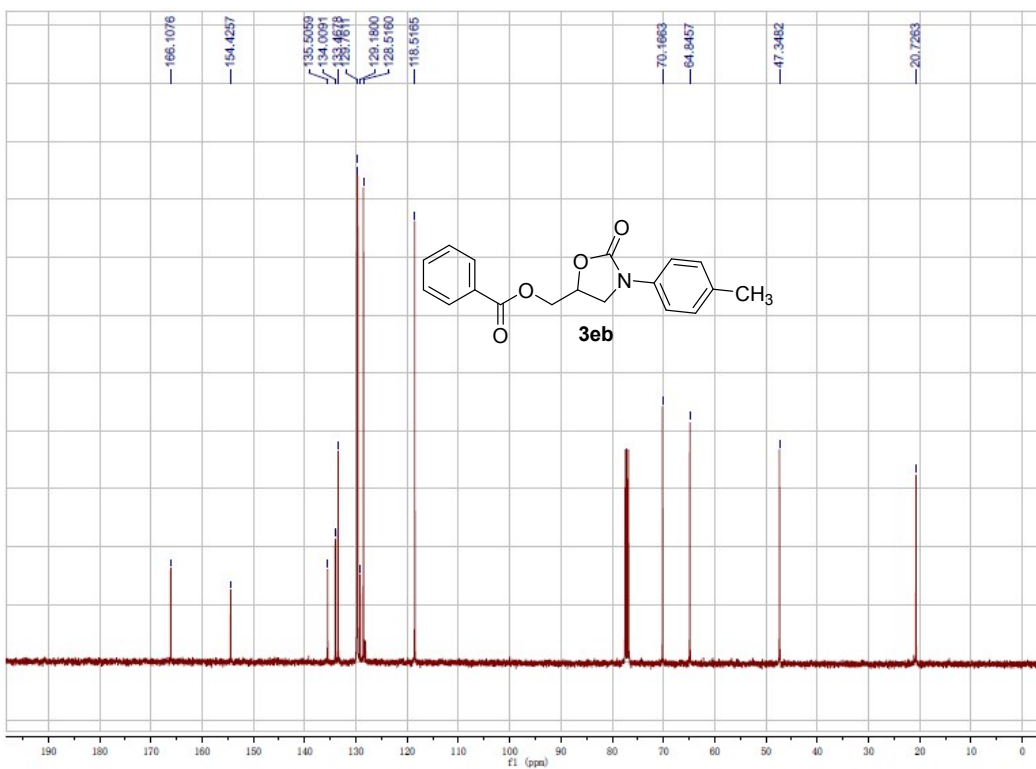

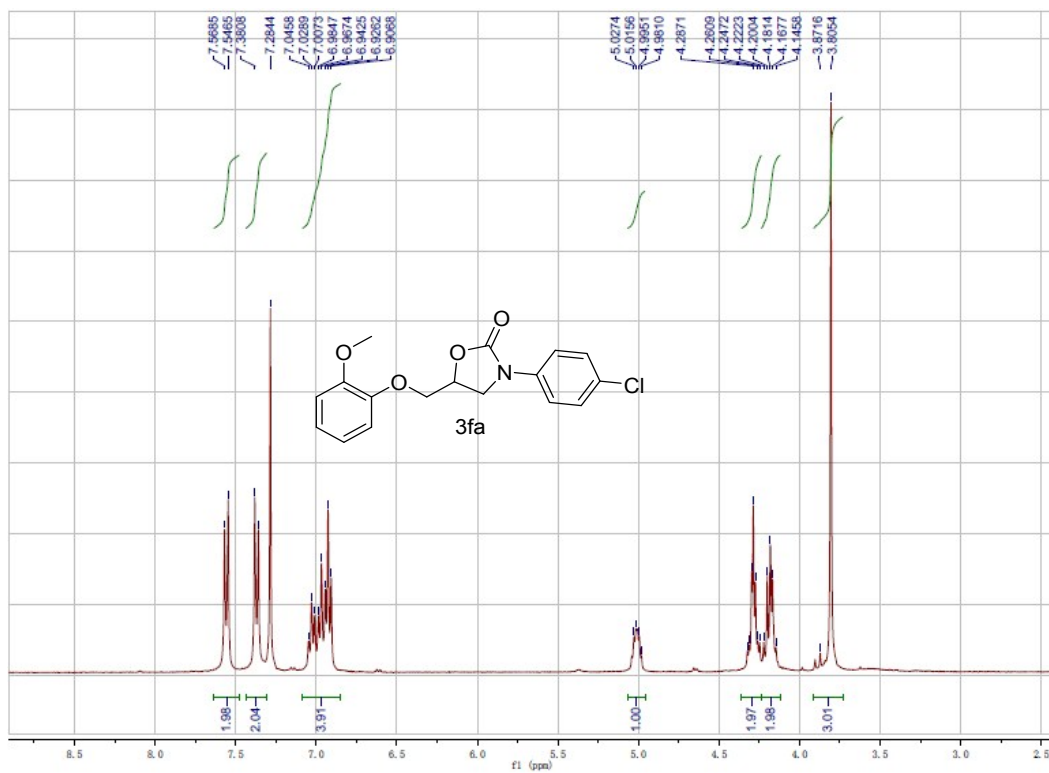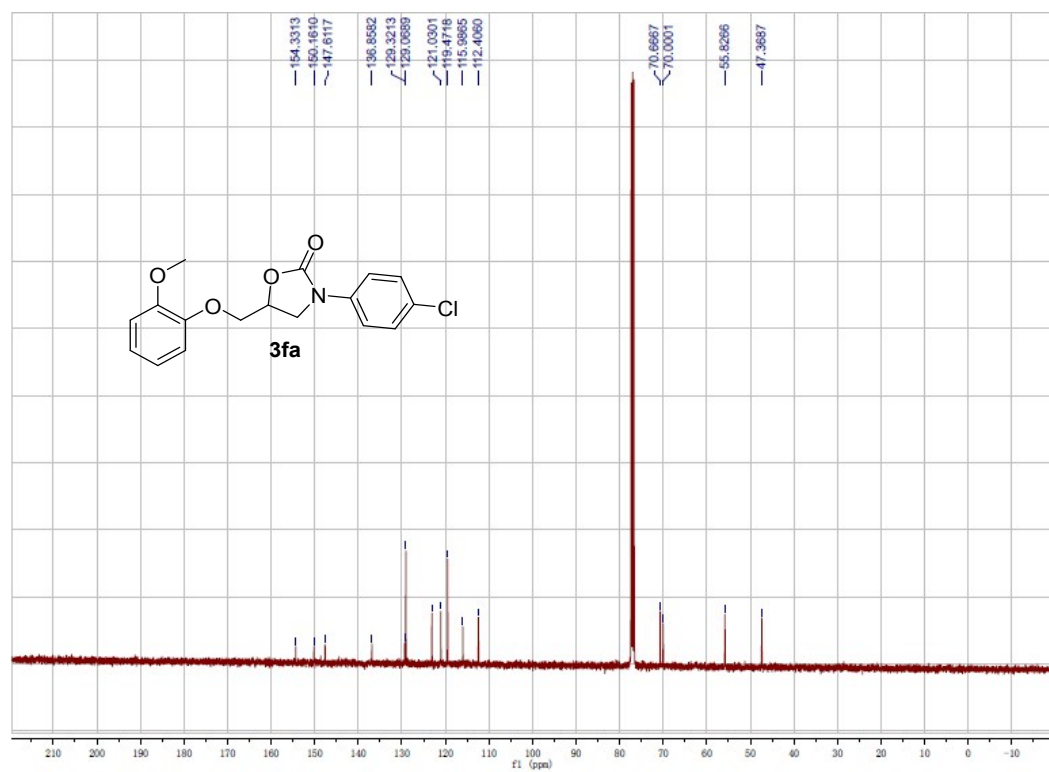



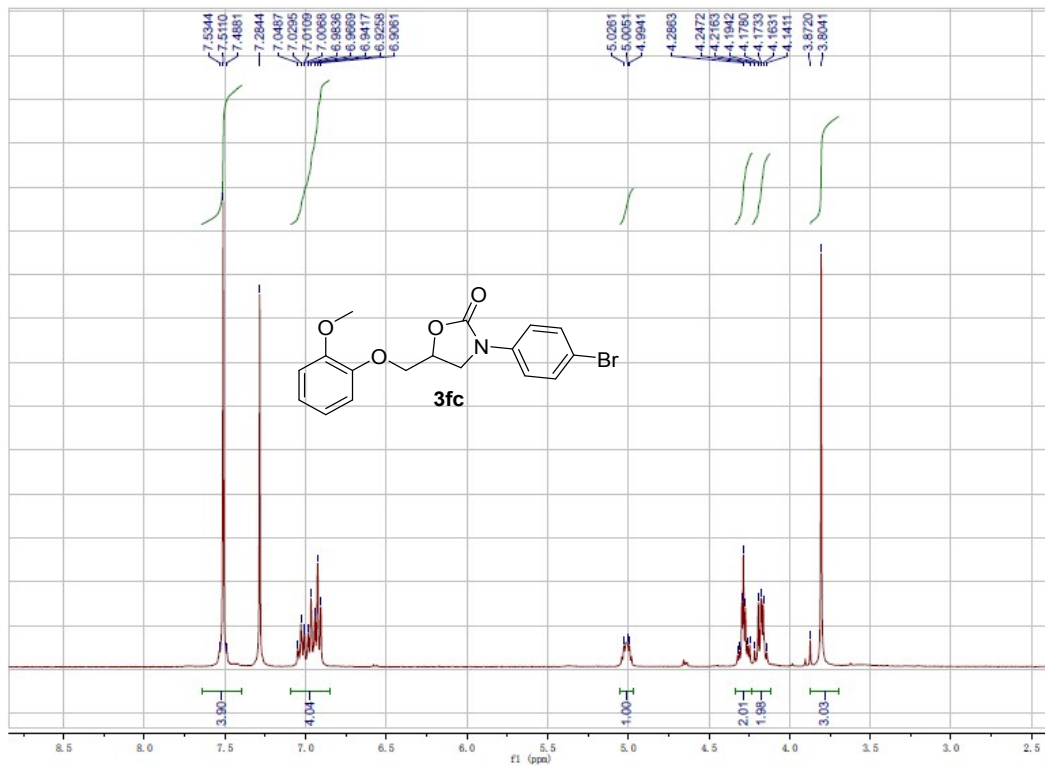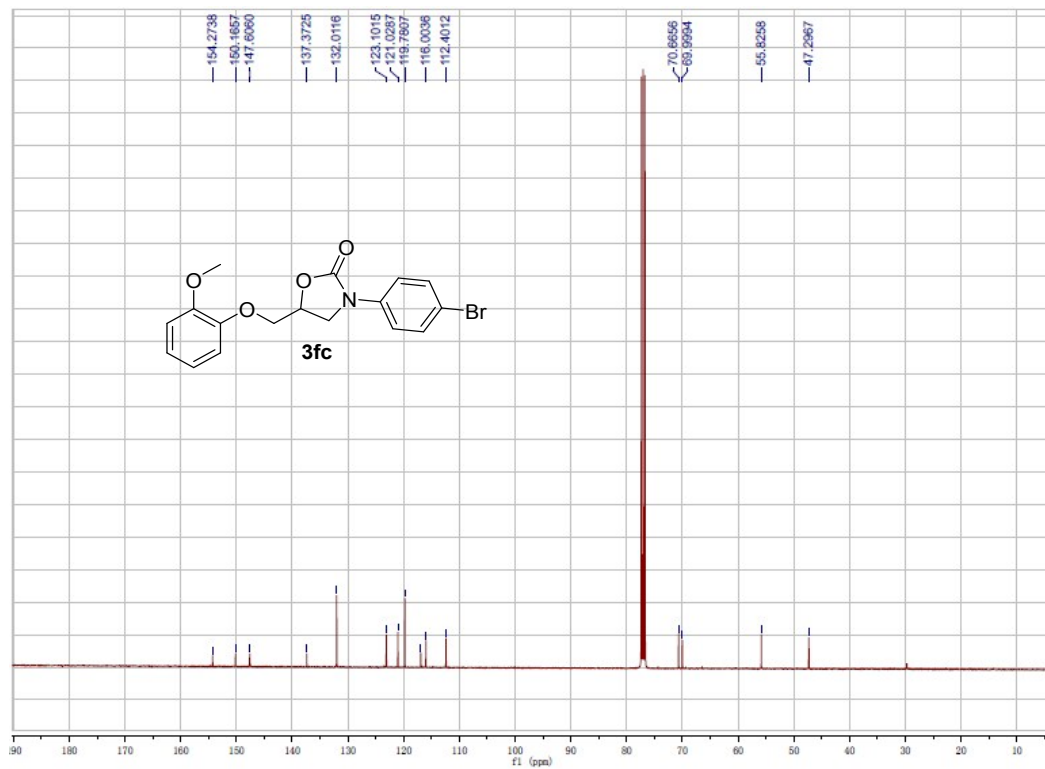

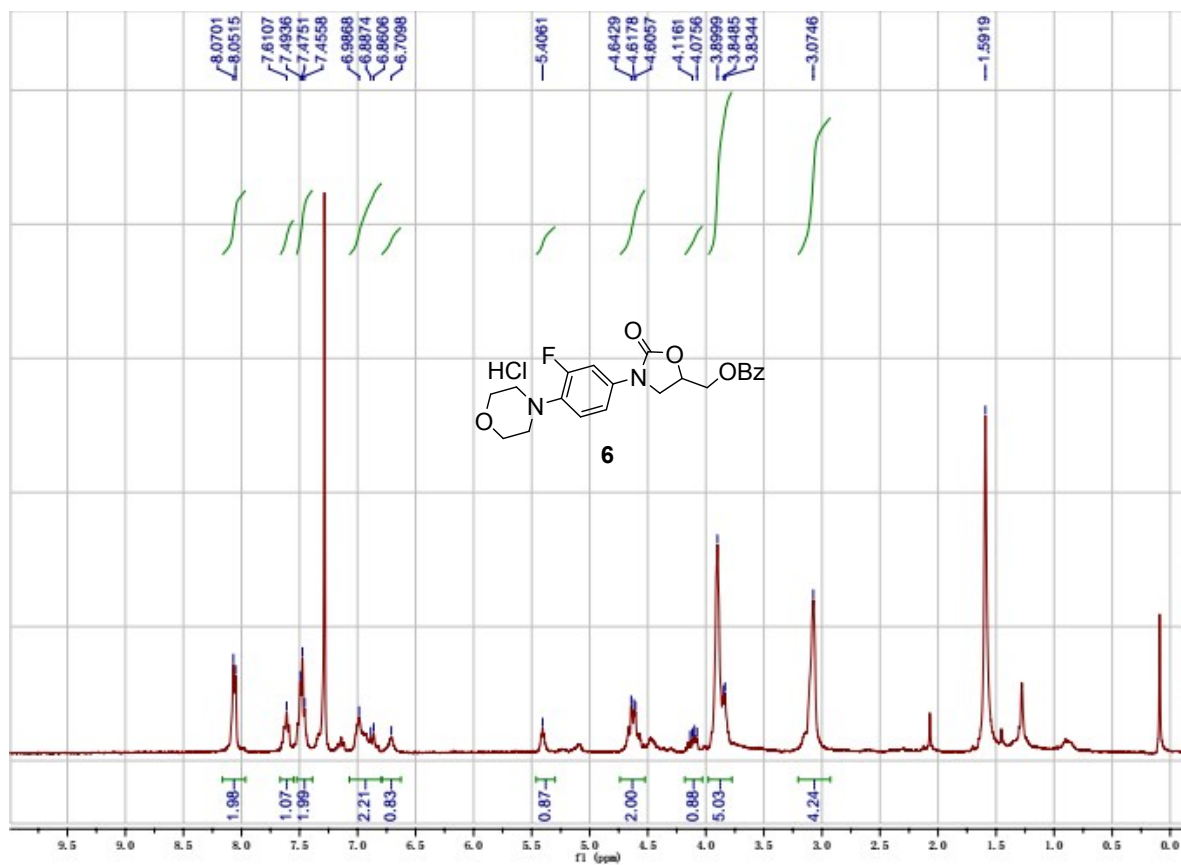

## HRMS copies of 2-oxazolidinones

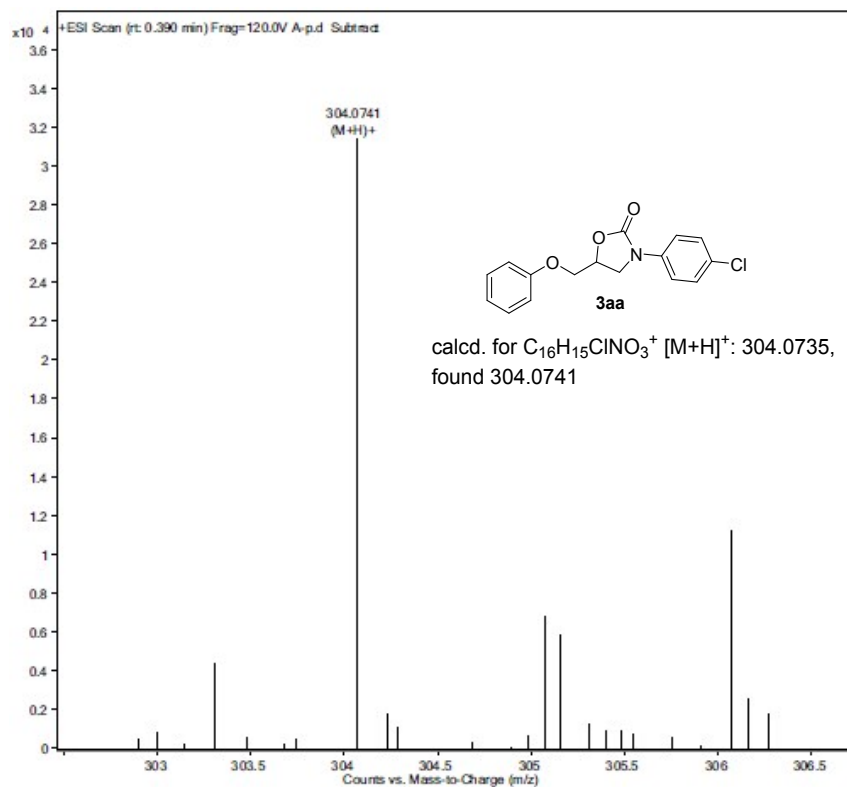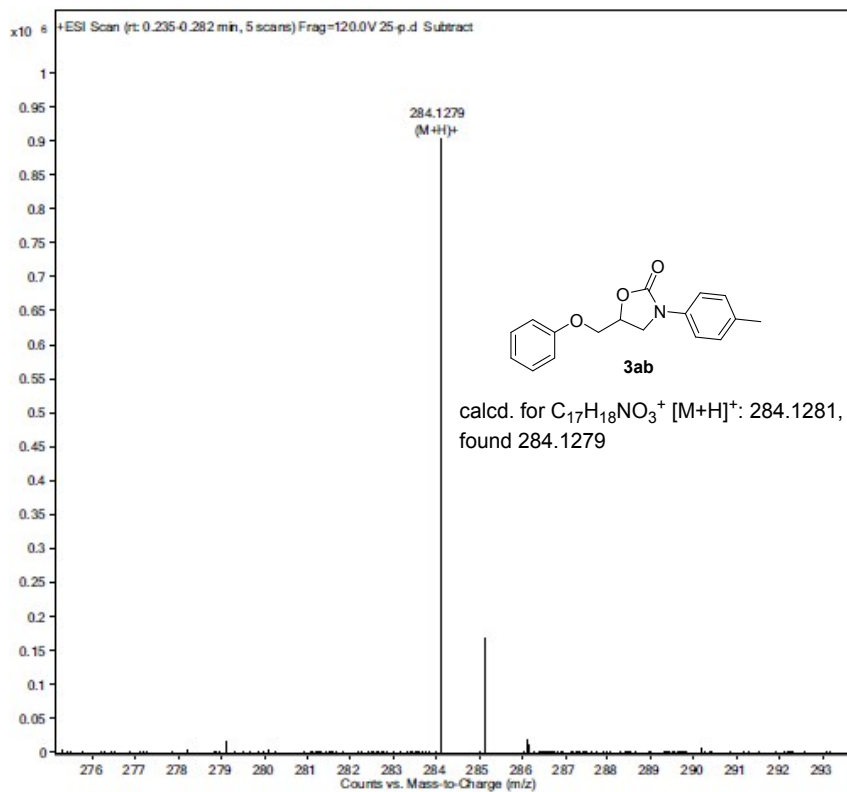

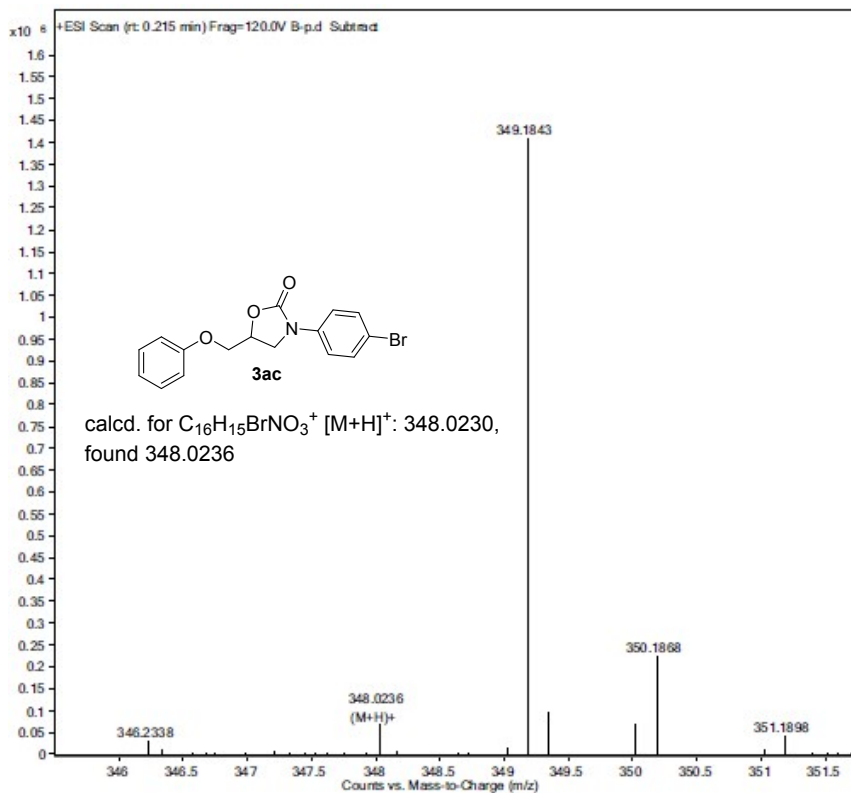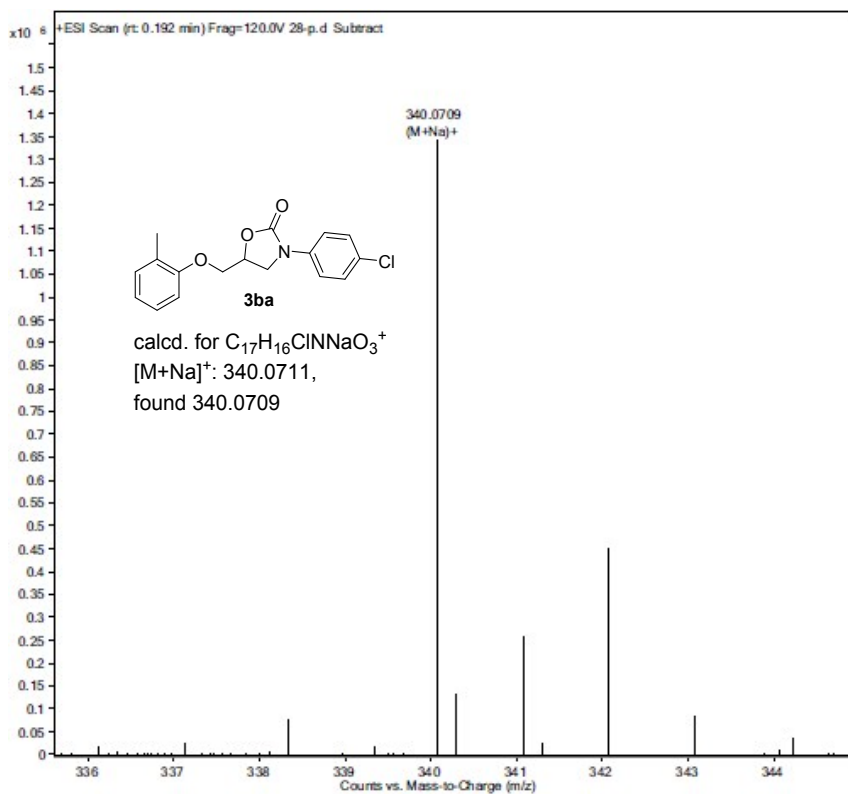

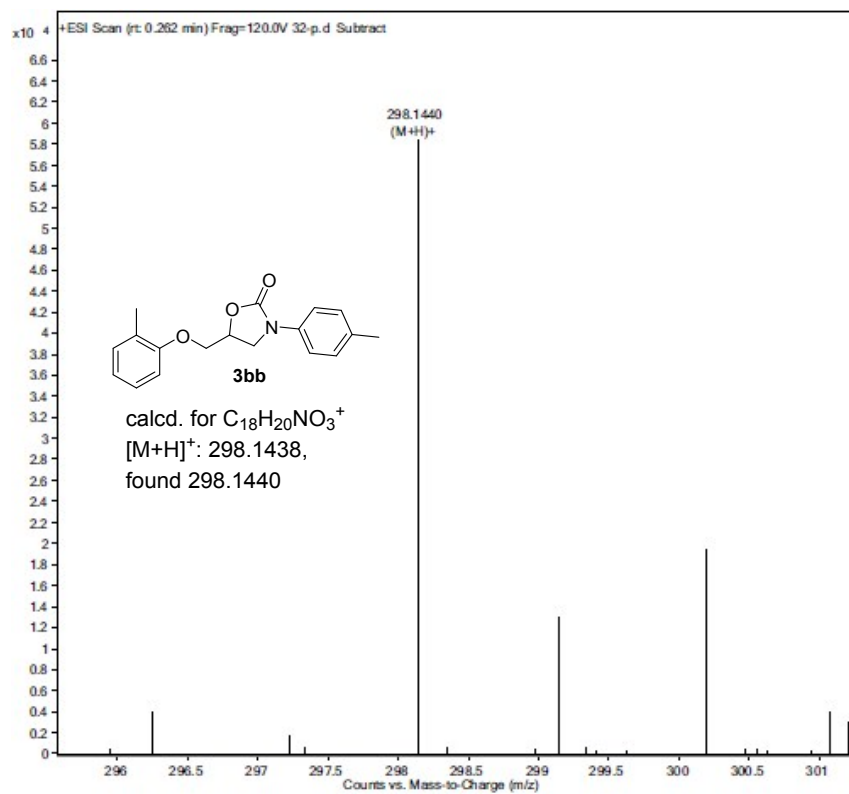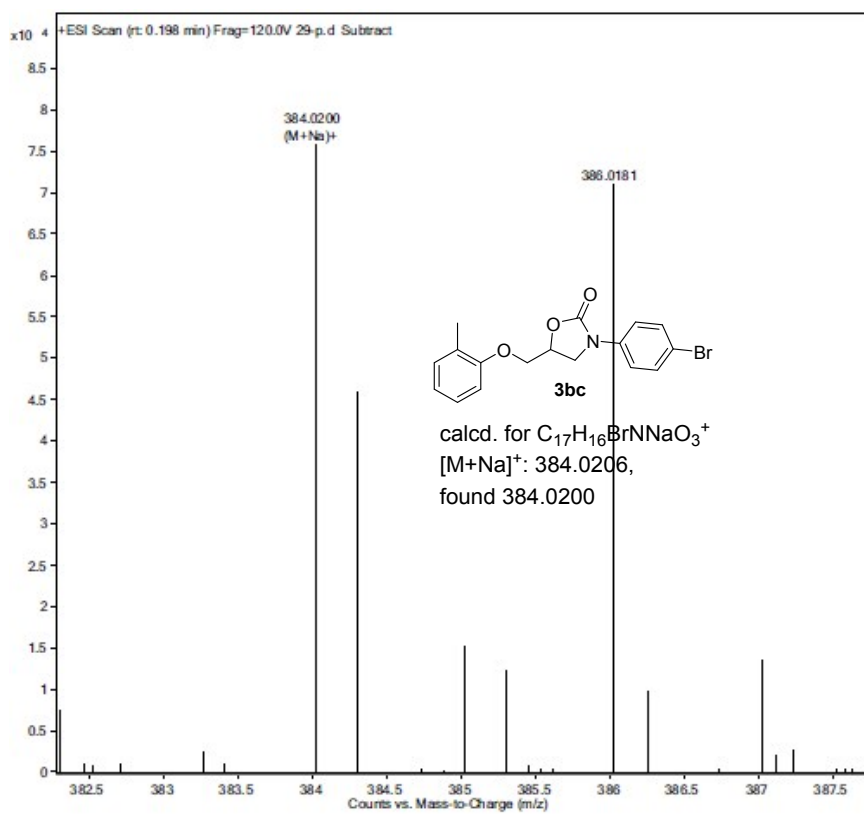

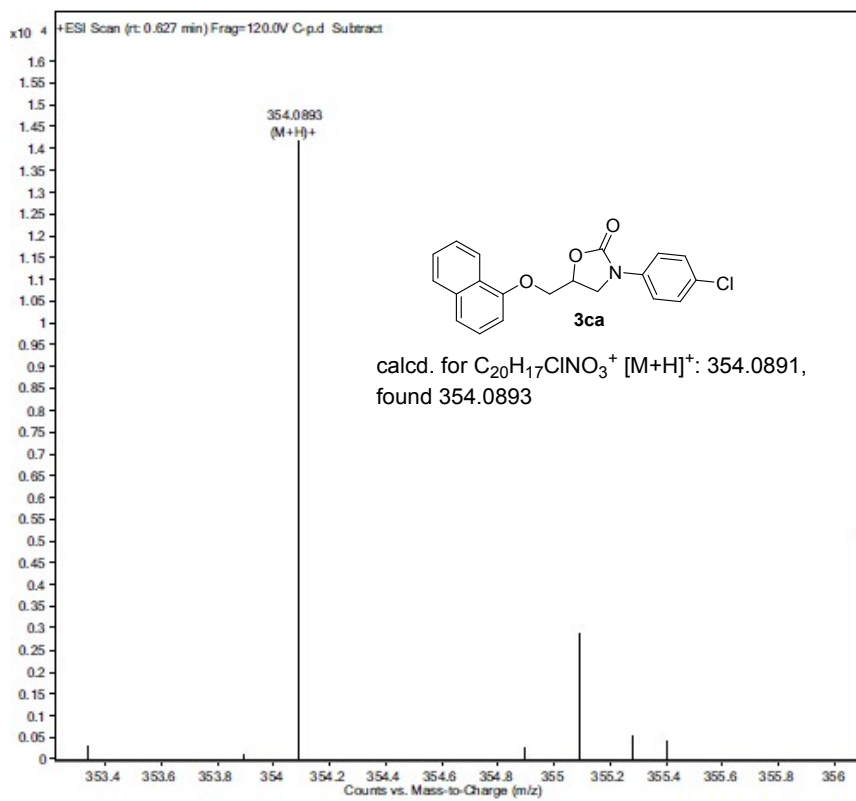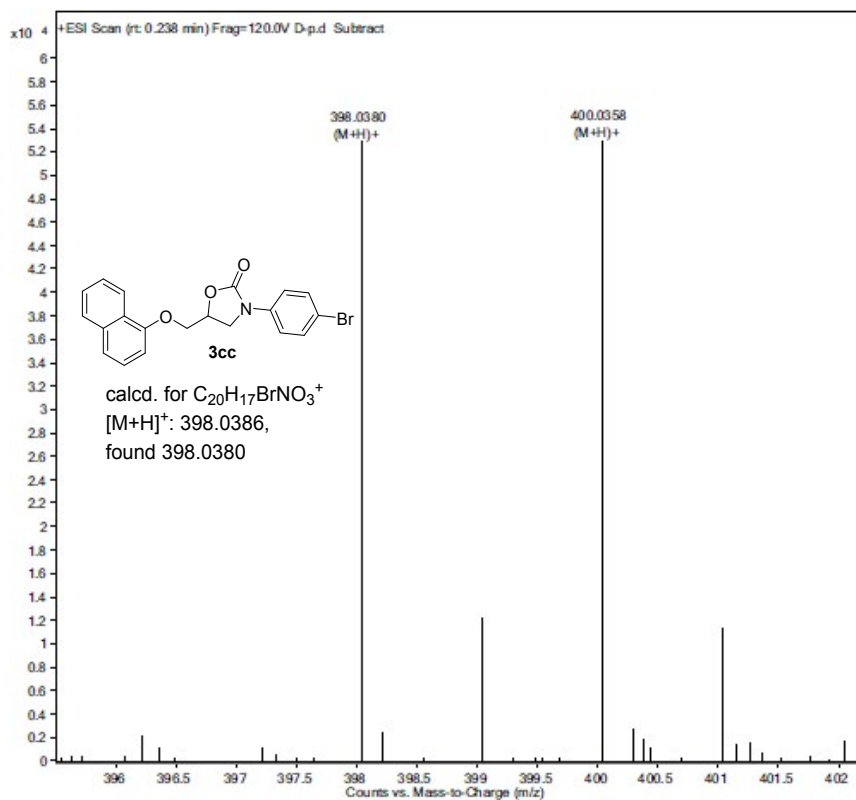

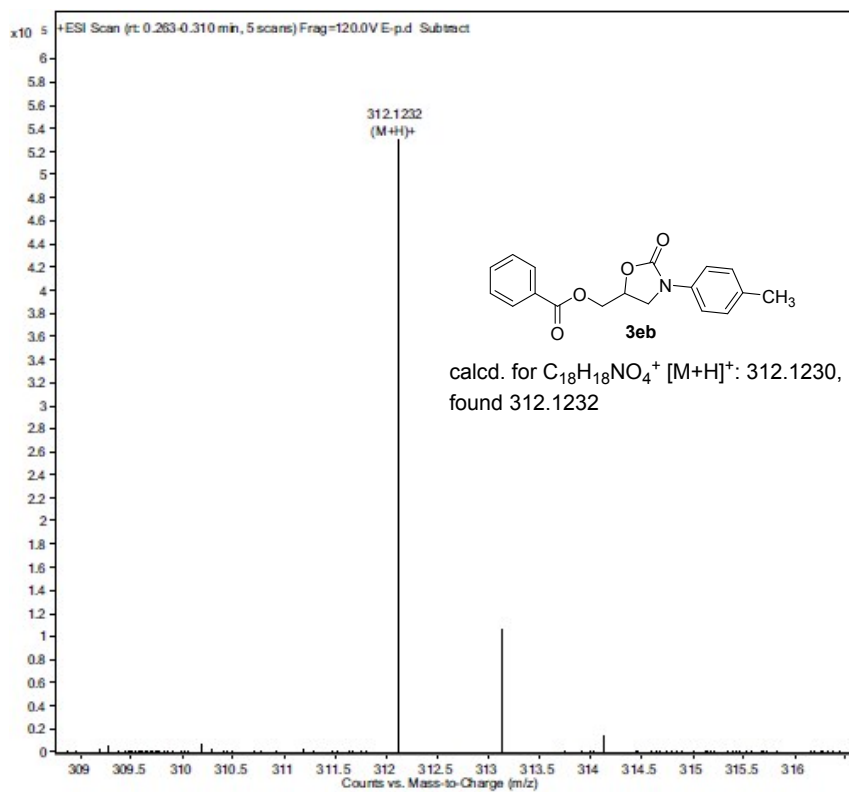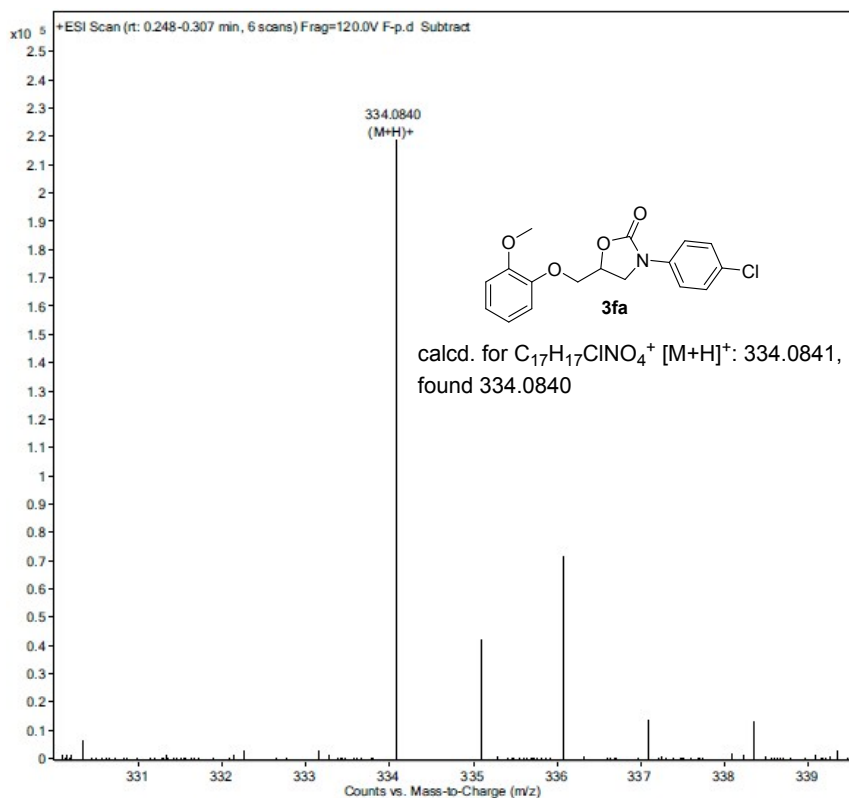

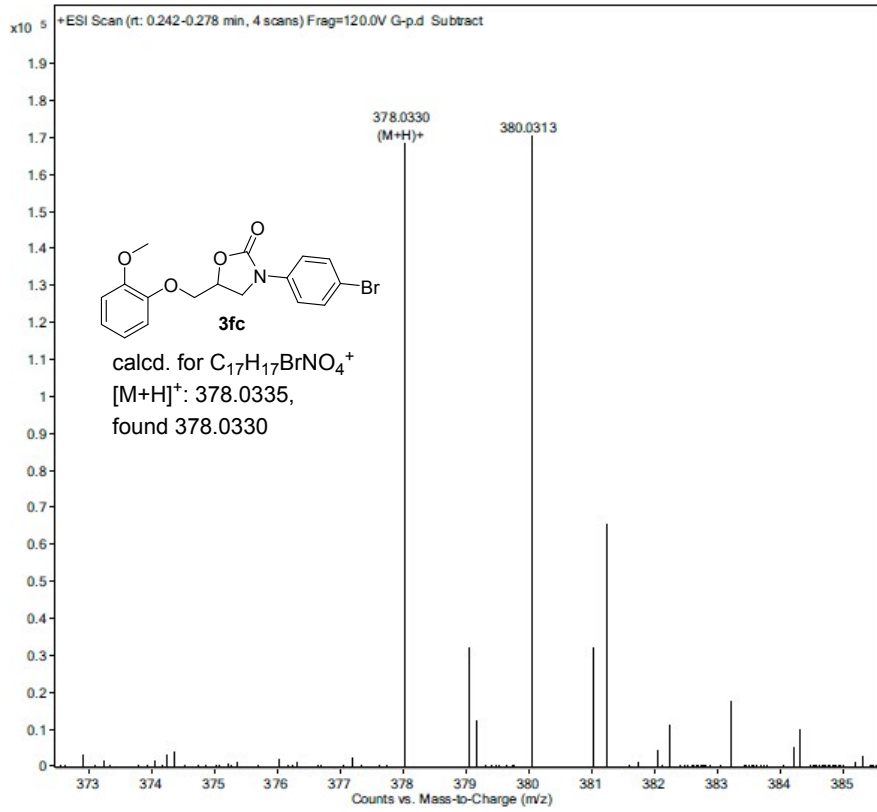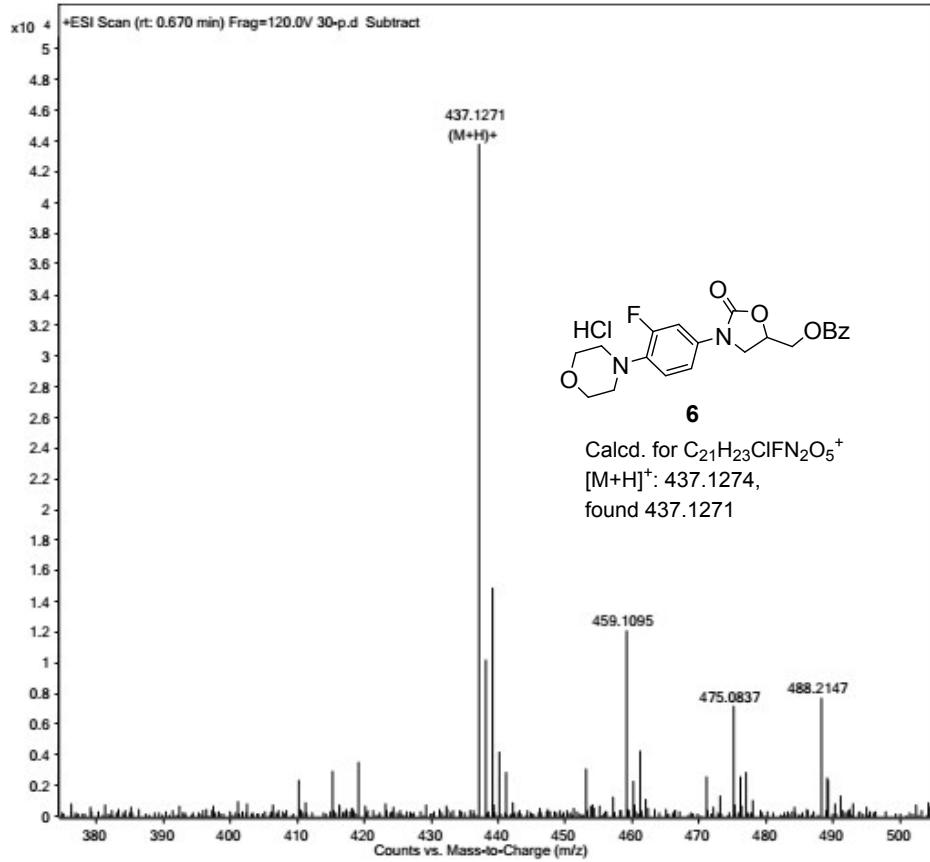

Supplement: d0ra00693a1.pdf [file d0ra00693a1.pdf]
